# Supplementary material for: Retrotransposons spread potential cis-regulatory elements during mammary gland evolution
Source: PubMed Central journal article supplement (PMC7145552; doi:10.1093/nar/gkz1003), 2019-10-23
Supplement: gkz1003_supplemental_file.pdf [file gkz1003_supplemental_file.pdf]

# Supplementary Material for “Retrotransposons spread potential *cis*-regulatory elements during mammary gland evolution”

Hidenori Nishihara

## Table of contents

|                          |             |
|--------------------------|-------------|
| Figure S1                | Page 2      |
| Figure S2                | Page 3      |
| Figure S3                | Pages 4–5   |
| Figure S4                | Pages 6–7   |
| Figure S5                | Pages 8–9   |
| Figure S6                | Pages 10–11 |
| Figure S7                | Page 12     |
| Figure S8                | Page 13     |
| Figure S9                | Page 14     |
| Figure S10               | Pages 15–19 |
| Figure S11               | Pages 20–21 |
| Figure S12               | Pages 22–25 |
| Figure S13               | Page 26     |
| Figure S14               | Pages 27–30 |
| Figure S15               | Page 31     |
| Figure S16               | Page 32     |
| Figure S17               | Page 33     |
| Figure S18               | Page 34     |
| Figure S19               | Page 35     |
| Figure S20               | Page 36     |
| Table S1                 | Page 37     |
| Table S2                 | Page 38     |
| Supplementary References | Pages 39–40 |

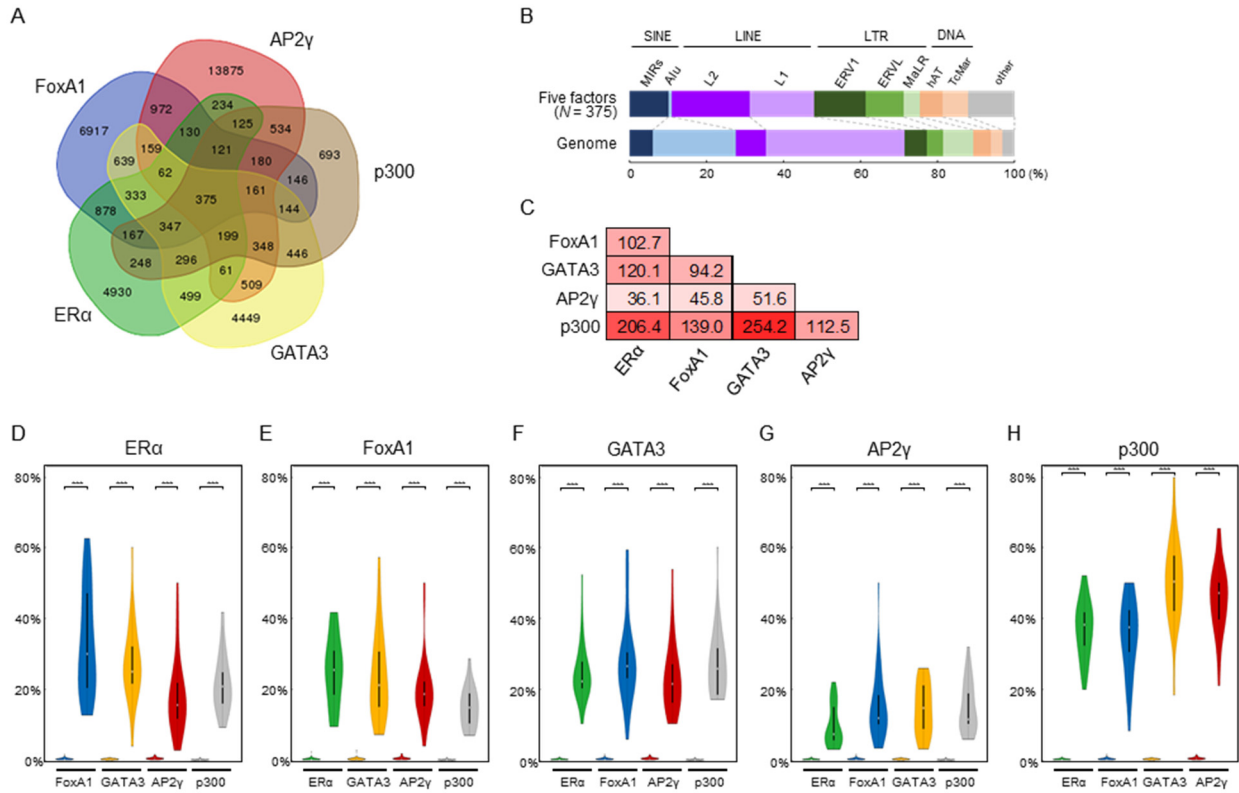

**Figure S1.** Enrichment of multiple transcription factor binding sites on the same TE sequence. **(A)** Venn diagram showing the number of TE copies containing binding sites of all combinations of the four transcription factors and a co-activating factor p300. **(B)** Relative proportion of the TE categories bound by all five factors shown in **(A)** compared with the proportion of all human TEs (genome). **(C)** Fold enrichment of binding sites located in the same TE sequence for all combinations of the two factors. **(D–H)** Violin plots representing the proportion of the binding events for the transcription factors shown below each graph under the condition of binding of ERα **(D)**, FoxA1 **(E)**, GATA3 **(F)**, AP2γ **(G)**, and p300 **(H)** within the same TE copy. The number of binding events was calculated separately for each TE superfamily/clade for the plots. For each combination, expected and observed proportions are shown on the left and right, respectively. All combinations showed a significant enrichment ( $\chi^2$ -test,  $***P < 10^{-10}$ ).

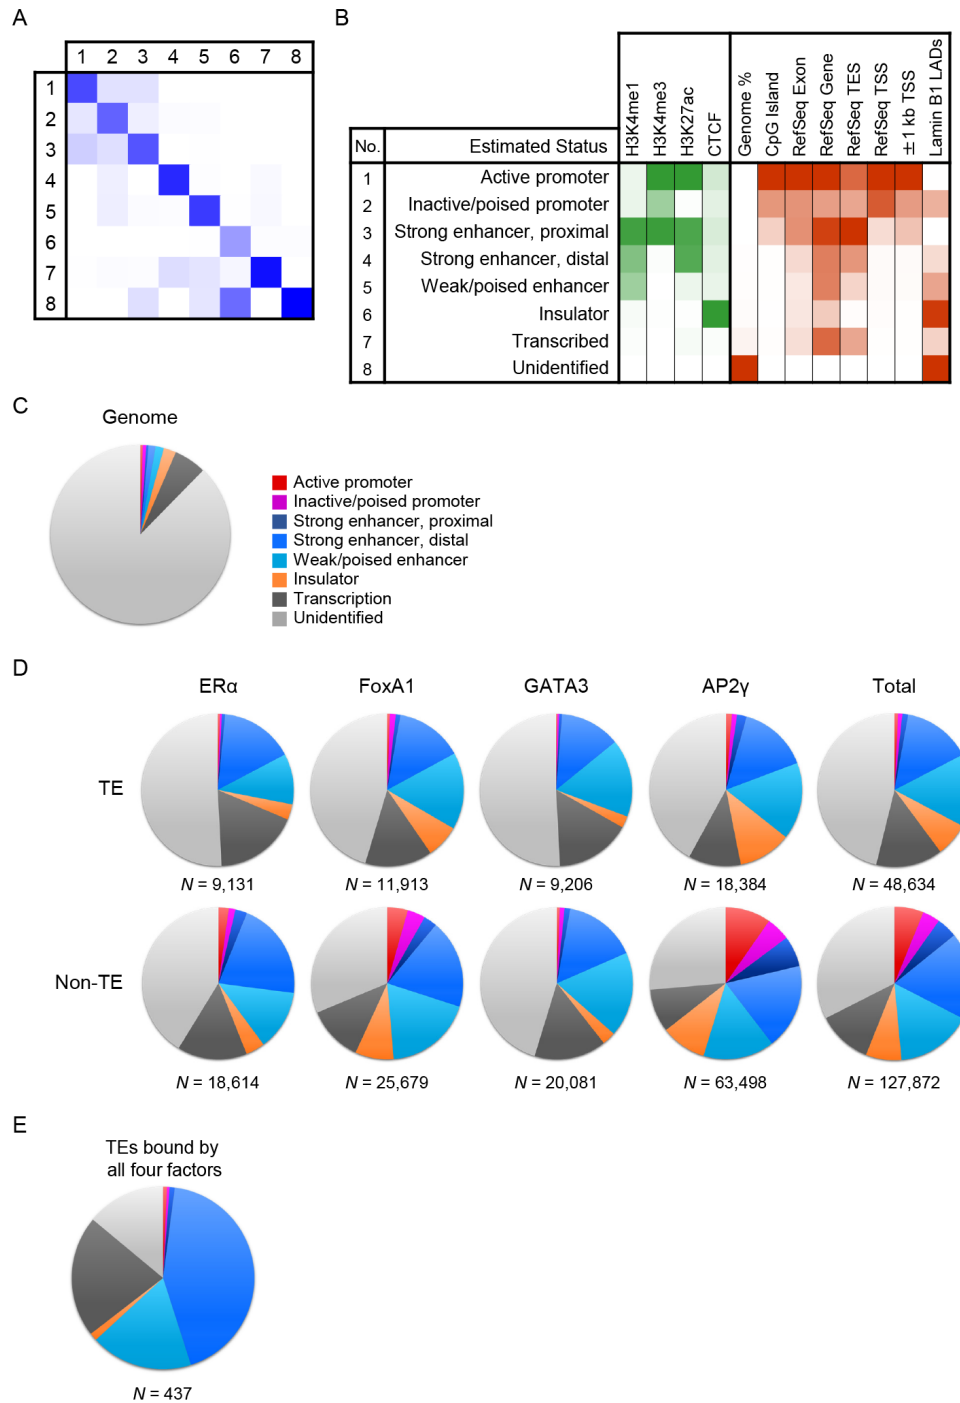

**Figure S2.** Functional annotation of the MCF-7 genome. **(A)** Distribution of transition parameters among the eight states produced by ChromHMM (1). **(B)** Classification of the eight states shown in panel **(A)**. The functions are estimated based on the emission probability matrix for the histone marks (H3K4me1, H3K4me3, and H3K27ac) and CTCF binding (left) as well as the enrichment in various genomic annotations (right) produced by ChromHMM. **(C)** Proportion of the estimated functional regions in the whole genome. **(D)** Proportion of the estimated function of the TE (top) and non-TE (bottom) binding sites for ER $\alpha$ , FoxA1, GATA3, and AP2 $\gamma$ . **(E)** Proportion of the estimated function of non-redundant TE copies bound by all four transcription factors as revealed in Figure S1A.

| Class       | Clade / superfamily | Family / subgroup | ERα       | FoxA1 | GATA3 | AP2γ |   |   |
|-------------|---------------------|-------------------|-----------|-------|-------|------|---|---|
| SINE        | Alu                 | AluJ              |           |       |       |      |   |   |
|             |                     | AluS              |           |       |       |      |   |   |
|             |                     | AluY              |           |       |       |      |   |   |
|             |                     | Alu_old           |           |       |       |      |   |   |
|             | MIRs                | MIR               |           | ■     |       | ■    |   |   |
|             |                     | MIR3              |           | ■     |       | ■    |   |   |
|             | AmnSINE1            | AmnSINE1          |           |       |       | ■    |   |   |
|             | AmnSINE2            | AmnSINE2          |           |       |       | ■    |   |   |
|             | LF-SINE             | LF-SINE           |           |       |       | ■    |   |   |
|             | MamSINE1            | MamSINE1          | ■         |       |       |      |   |   |
| SVA         | SVA                 |                   |           |       |       |      |   |   |
| LINE        | L1                  | L1M               |           |       |       |      |   |   |
|             |                     | L1MA              |           |       |       |      |   |   |
|             |                     | L1MB              |           |       |       |      |   |   |
|             |                     | L1MC              |           |       |       |      |   |   |
|             |                     | L1MD              |           |       |       |      |   |   |
|             |                     | L1ME              |           |       |       |      |   |   |
|             |                     | L1P               |           |       |       |      |   |   |
|             |                     | L1PA              |           |       |       |      |   |   |
|             |                     | L1PB              |           |       |       |      |   |   |
|             |                     | L1PREC2           |           |       |       |      |   |   |
|             |                     | L1HS              |           |       | ■     |      |   |   |
|             |                     | HAL1              |           |       |       |      |   |   |
|             |                     | X9_LINE           |           |       |       |      |   |   |
|             |                     | MARE6             |           |       |       |      |   |   |
|             |                     | L1-Tx1            | L2        |       | ■     | ■    | ■ |   |
|             | L2                  | AmnL2-1           |           |       |       |      |   |   |
|             |                     | L2-2_Mam          |           |       |       |      |   |   |
|             |                     | X13_LINE          |           |       |       |      |   |   |
|             |                     | X15_LINE          |           |       |       |      |   |   |
|             |                     | X24_LINE          |           |       |       |      |   |   |
|             |                     | UCON86            |           |       |       |      |   |   |
|             |                     | CR1               | L3        |       |       |      |   | ■ |
|             |                     |                   | CR1_Mam   |       |       |      |   |   |
|             |                     |                   | CR1-1_Amn |       |       |      |   |   |
|             |                     |                   | Plat_L3   |       |       |      |   |   |
| CR1-L3_Croc |                     |                   |           |       |       |      |   |   |
| CR1-3_Croc  |                     |                   |           |       |       |      |   |   |
| CR1-11_Crp  |                     |                   |           |       |       |      |   |   |
| CR1-12_AMi  |                     |                   |           |       |       |      |   |   |
| CR1-13_AMi  |                     |                   |           |       |       |      |   |   |
| CR1-16_AMi  |                     |                   |           |       |       |      |   |   |
| X1_LINE     |                     |                   |           |       |       |      |   |   |
| X2_LINE     |                     |                   |           |       |       |      |   |   |
| X5_LINE     |                     |                   |           |       |       |      |   |   |
| X6_LINE     |                     |                   |           |       |       |      |   |   |
| X7_LINE     |                     |                   |           |       |       |      |   |   |
| X8_LINE     |                     |                   |           |       |       |      |   |   |
| X17_LINE    |                     |                   |           |       |       |      |   |   |
| X20_LINE    |                     |                   |           |       |       |      |   |   |
| X21_LINE    |                     |                   |           |       |       |      |   |   |
| RTE-BovB    | MamRTE1             |                   | ■         | ■     |       |      |   |   |
|             | MamRTE2             |                   | ■         | ■     |       |      |   |   |
| RTE-X       | L4                  |                   |           |       |       |      |   |   |
| L5          |                     |                   |           |       |       |      |   |   |
| Dong-R4     | Mam_R4              |                   |           |       |       |      |   |   |
| I-Jockey    | X12_LINE            |                   |           |       |       |      |   |   |
| Penelope    | Penelope1_Vert      |                   |           |       |       |      |   |   |
| LTR         | ERV1                | ERV24_Prim        |           |       |       |      |   |   |
|             |                     | EUTREP7           |           |       |       |      |   |   |
|             |                     | Harlequin         |           |       |       |      |   |   |
|             |                     | HERV1             |           |       |       |      |   |   |
|             |                     | HERV3             |           |       |       |      |   |   |
|             |                     | HERV4             |           |       |       |      |   |   |
|             |                     | HERV9             |           |       |       |      |   |   |
|             |                     | HERV15            |           |       |       |      |   |   |
|             |                     | HERV17            |           |       |       |      |   |   |
|             |                     | HERV30            |           |       |       |      |   |   |
|             |                     | HERV35            |           |       |       |      |   |   |
|             |                     | HERVE             |           |       |       |      |   |   |
|             |                     | HERV-Fc1          |           |       |       |      |   |   |
|             |                     | HERV-Fc2          |           |       |       |      |   |   |
|             |                     | HERV-FH19         |           |       |       |      |   |   |
|             |                     | HERV-FH21         |           |       |       |      |   |   |
|             |                     | HERVH             |           |       |       |      |   |   |
|             |                     | HERVH48           |           |       |       |      |   |   |
|             |                     | HERV1             |           |       |       |      |   |   |
|             |                     | HERVIP10          |           |       |       |      |   |   |
|             |                     | HERVP71A          |           |       |       |      |   |   |
|             |                     | HERVS71           |           |       |       |      |   |   |
|             |                     | HUERS-P1          |           |       |       |      |   |   |
|             |                     | HUERS-P2          |           |       |       |      |   |   |
|             |                     | HUERS-P3          |           |       |       |      |   |   |
|             |                     | LOR1              |           |       |       |      |   |   |
|             |                     | LTR06             |           |       |       |      |   |   |
|             |                     | LTR1              |           |       |       |      |   |   |
|             |                     | LTR2              |           |       |       |      |   |   |
|             |                     | LTR4              |           |       |       |      |   |   |
|             |                     | LTR6              |           |       |       |      |   |   |
|             |                     | LTR7              |           |       |       |      |   |   |

| Class      | Clade / superfamily | Family / subgroup | ERα | FoxA1 | GATA3 | AP2γ |  |
|------------|---------------------|-------------------|-----|-------|-------|------|--|
| LTR        | ERV1                | LTR8              |     |       |       |      |  |
|            |                     | LTR9              |     |       |       |      |  |
|            |                     | LTR10             |     |       |       |      |  |
|            |                     | LTR12             |     |       |       |      |  |
|            |                     | LTR15             |     |       |       |      |  |
|            |                     | LTR17             |     |       |       |      |  |
|            |                     | LTR19             |     |       |       |      |  |
|            |                     | LTR21             |     |       |       |      |  |
|            |                     | LTR23             |     |       |       |      |  |
|            |                     | LTR24             |     |       |       |      |  |
|            |                     | LTR25             |     |       |       |      |  |
|            |                     | LTR26             |     |       |       |      |  |
|            |                     | LTR27             |     |       |       |      |  |
|            |                     | LTR28             |     |       |       |      |  |
|            |                     | LTR29             |     |       |       |      |  |
|            |                     | LTR30             |     |       |       |      |  |
|            |                     | LTR31             |     |       |       |      |  |
|            |                     | LTR34             |     |       |       |      |  |
|            |                     | LTR35             |     |       |       |      |  |
|            |                     | LTR36             |     |       |       |      |  |
|            |                     | LTR37             |     |       |       |      |  |
|            |                     | LTR38             |     |       |       |      |  |
|            |                     | LTR39             |     |       |       |      |  |
|            |                     | LTR43             |     |       |       |      |  |
|            |                     | LTR44             |     |       |       |      |  |
|            |                     | LTR45             |     |       |       |      |  |
|            |                     | LTR46             |     |       |       |      |  |
|            |                     | LTR48             |     |       |       |      |  |
|            |                     | LTR49             |     |       |       |      |  |
|            |                     | LTR51             |     |       |       |      |  |
|            |                     | LTR54             |     |       |       |      |  |
|            |                     | LTR56             |     |       |       |      |  |
|            |                     | LTR58             |     |       |       |      |  |
|            |                     | LTR59             |     |       |       |      |  |
|            |                     | LTR60             |     |       |       |      |  |
|            |                     | LTR61             |     |       |       |      |  |
|            |                     | LTR64             |     |       |       |      |  |
|            |                     | LTR65             |     |       |       |      |  |
|            |                     | LTR68             |     |       |       |      |  |
|            |                     | LTR70             |     |       |       |      |  |
|            |                     | LTR71             |     |       |       |      |  |
|            |                     | LTR72             |     |       |       |      |  |
|            |                     | LTR73             |     |       |       |      |  |
|            |                     | LTR75_1           |     |       |       |      |  |
|            |                     | LTR76             |     |       |       |      |  |
|            |                     | LTR77             |     |       |       |      |  |
|            |                     | LTR78             |     |       |       |      |  |
|            |                     | LTR109A2          |     |       |       |      |  |
|            |                     | LTR2752           |     |       |       |      |  |
|            |                     | MER4              |     |       |       |      |  |
|            |                     | MER31             |     |       |       |      |  |
|            |                     | MER34             |     |       |       |      |  |
|            |                     | MER39             |     |       |       |      |  |
|            |                     | MER41             |     |       |       |      |  |
|            |                     | MER48             |     |       |       |      |  |
| MER49      |                     |                   |     |       |       |      |  |
| MER49_4D   |                     |                   |     |       |       |      |  |
| MER50      |                     |                   |     |       |       |      |  |
| MER51      |                     |                   |     |       |       |      |  |
| MER52      |                     |                   |     |       |       |      |  |
| MER57      |                     |                   |     |       |       |      |  |
| MER61      |                     |                   |     |       |       |      |  |
| MER65      |                     |                   |     |       |       |      |  |
| MER66      |                     |                   |     |       |       |      |  |
| MER67      |                     |                   |     |       |       |      |  |
| MER72      |                     |                   |     |       |       |      |  |
| MER83      |                     |                   |     |       |       |      |  |
| MER84      |                     |                   |     |       |       |      |  |
| MER87      |                     |                   |     |       |       |      |  |
| MER89      |                     |                   |     |       |       |      |  |
| MER90      |                     |                   |     |       |       |      |  |
| MER92      |                     |                   |     |       |       |      |  |
| MER95      |                     |                   |     |       |       |      |  |
| MER101     |                     |                   |     |       |       |      |  |
| MER110     |                     |                   |     |       |       |      |  |
| PABL       |                     |                   |     |       |       |      |  |
| PRIMA4     |                     |                   |     |       |       |      |  |
| PRIMA41    |                     |                   |     |       |       |      |  |
| PRIMAX-int |                     |                   |     |       |       |      |  |
| PrimLTR79  |                     |                   |     |       |       |      |  |
| EUTREP15   |                     |                   |     |       |       |      |  |
| LTR103_Mam |                     |                   |     |       |       |      |  |
| HERVK      |                     |                   |     |       |       |      |  |
| HERVK11    |                     |                   |     |       |       |      |  |
| HERVK13    |                     |                   |     |       |       |      |  |
| HERVK14    |                     |                   |     |       |       |      |  |
| HERVK22    |                     |                   |     |       |       |      |  |
| HERVK3     |                     |                   |     |       |       |      |  |
| HERVK9     |                     |                   |     |       |       |      |  |
| HERVKC4    |                     |                   |     |       |       |      |  |

| Class     | Clade / superfamily | Family / subgroup | ERα | FoxA1 | GATA3 | AP2γ |  |
|-----------|---------------------|-------------------|-----|-------|-------|------|--|
| LTR       | ERVK                | LTR13             |     |       |       |      |  |
|           |                     | LTR14             |     |       |       |      |  |
|           |                     | LTR22             |     |       |       |      |  |
|           |                     | LTR3              |     |       |       |      |  |
|           |                     | LTR5              |     |       |       |      |  |
|           |                     | MER11             |     |       |       |      |  |
|           |                     | MER9              |     |       |       |      |  |
|           |                     | ERV3-16A3         |     |       |       |      |  |
|           |                     | ERV1              |     |       |       |      |  |
|           |                     | ERV147            |     |       |       |      |  |
|           |                     | HERV16            |     |       |       |      |  |
|           |                     | HERV1             |     |       |       |      |  |
|           |                     | HERV18            |     |       |       |      |  |
|           |                     | HERV132           |     |       |       |      |  |
|           |                     | HERV140           |     |       |       |      |  |
|           |                     | HERV166           |     |       |       |      |  |
|           |                     | HERV174           |     |       |       |      |  |
|           |                     | LTR16             |     |       |       |      |  |
|           |                     | LTR18             |     |       |       |      |  |
|           |                     | LTR32             |     |       |       |      |  |
|           |                     | LTR33             |     |       |       |      |  |
|           |                     | LTR40             |     |       |       |      |  |
|           |                     | LTR41             |     |       |       |      |  |
|           |                     | LTR42             |     |       |       |      |  |
|           |                     | LTR47             |     |       |       |      |  |
|           |                     | LTR50             |     |       |       |      |  |
|           |                     | LTR52             |     |       |       |      |  |
|           |                     | LTR53             |     |       |       |      |  |
|           |                     | LTR55             |     |       |       |      |  |
|           |                     | LTR57             |     |       |       |      |  |
|           |                     | LTR62             |     |       |       |      |  |
|           |                     | LTR66             |     |       |       |      |  |
|           |                     | LTR67B            |     |       |       |      |  |
|           |                     | LTR69             |     |       |       |      |  |
|           |                     | LTR75             |     |       |       |      |  |
|           |                     | LTR79             |     |       |       |      |  |
|           |                     | LTR80             |     |       |       |      |  |
|           |                     | LTR82             |     |       |       |      |  |
|           |                     | LTR83             |     |       |       |      |  |
|           |                     | LTR84             |     |       |       |      |  |
|           |                     | LTR86             |     |       |       |      |  |
|           |                     | LTR87             |     |       |       |      |  |
|           |                     | LTR89             |     |       |       |      |  |
|           |                     | LTR101            |     |       |       |      |  |
|           |                     | LTR102            |     |       |       |      |  |
| LTR105    |                     |                   |     |       |       |      |  |
| LTR108    |                     |                   |     |       |       |      |  |
| MER21     |                     |                   |     |       |       |      |  |
| MER54     |                     |                   |     |       |       |      |  |
| MER68     |                     |                   |     |       |       |      |  |
| MER70     |                     |                   |     |       |       |      |  |
| MER73     |                     |                   |     |       |       |      |  |
| MER74     |                     |                   |     |       |       |      |  |
| MER76     |                     |                   |     |       |       |      |  |
| MER77     |                     |                   |     |       |       |      |  |
| MER88     |                     |                   |     |       |       |      |  |
| MLT2      |                     |                   |     |       |       |      |  |
| Eutr10    |                     |                   |     |       |       |      |  |
| MLT       |                     |                   |     |       |       |      |  |
| MLT1      |                     |                   |     |       |       |      |  |
| MLT1A     |                     |                   |     |       |       |      |  |
| MLT1B     |                     |                   |     |       |       |      |  |
| MLT1C     |                     |                   |     |       |       |      |  |
| MLT1D     |                     |                   |     |       |       |      |  |
| MLT1E     |                     |                   |     |       |       |      |  |
| MLT1F     |                     |                   |     |       |       |      |  |
| MLT1G     |                     |                   |     |       |       |      |  |
| MLT1H     |                     |                   |     |       |       |      |  |
| MLT1I     |                     |                   |     |       |       |      |  |
| MLT1J     |                     |                   |     |       |       |      |  |
| MLT1K     |                     |                   |     |       |       |      |  |
| MLT1L     |                     |                   |     |       |       |      |  |
| MLT1M     |                     |                   |     |       |       |      |  |
| MLT1N2    |                     |                   |     |       |       |      |  |
| MLT1O     |                     |                   |     |       |       |      |  |
| MST       |                     |                   |     |       |       |      |  |
| MSTA      |                     |                   |     |       |       |      |  |
| MSTB      |                     |                   |     |       |       |      |  |
| MSTC      |                     |                   |     |       |       |      |  |
| MSTD      |                     |                   |     |       |       |      |  |
| THE1      |                     |                   |     |       |       |      |  |
| THE1A     |                     |                   |     |       |       |      |  |
| THE1B     |                     |                   |     |       |       |      |  |
| THE1C     |                     |                   |     |       |       |      |  |
| THE1D     |                     |                   |     |       |       |      |  |
| MamGyp    |                     |                   |     |       |       |      |  |
| MamGypsy2 |                     |                   |     |       |       |      |  |
| X1_LR     |                     |                   |     |       |       |      |  |

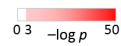

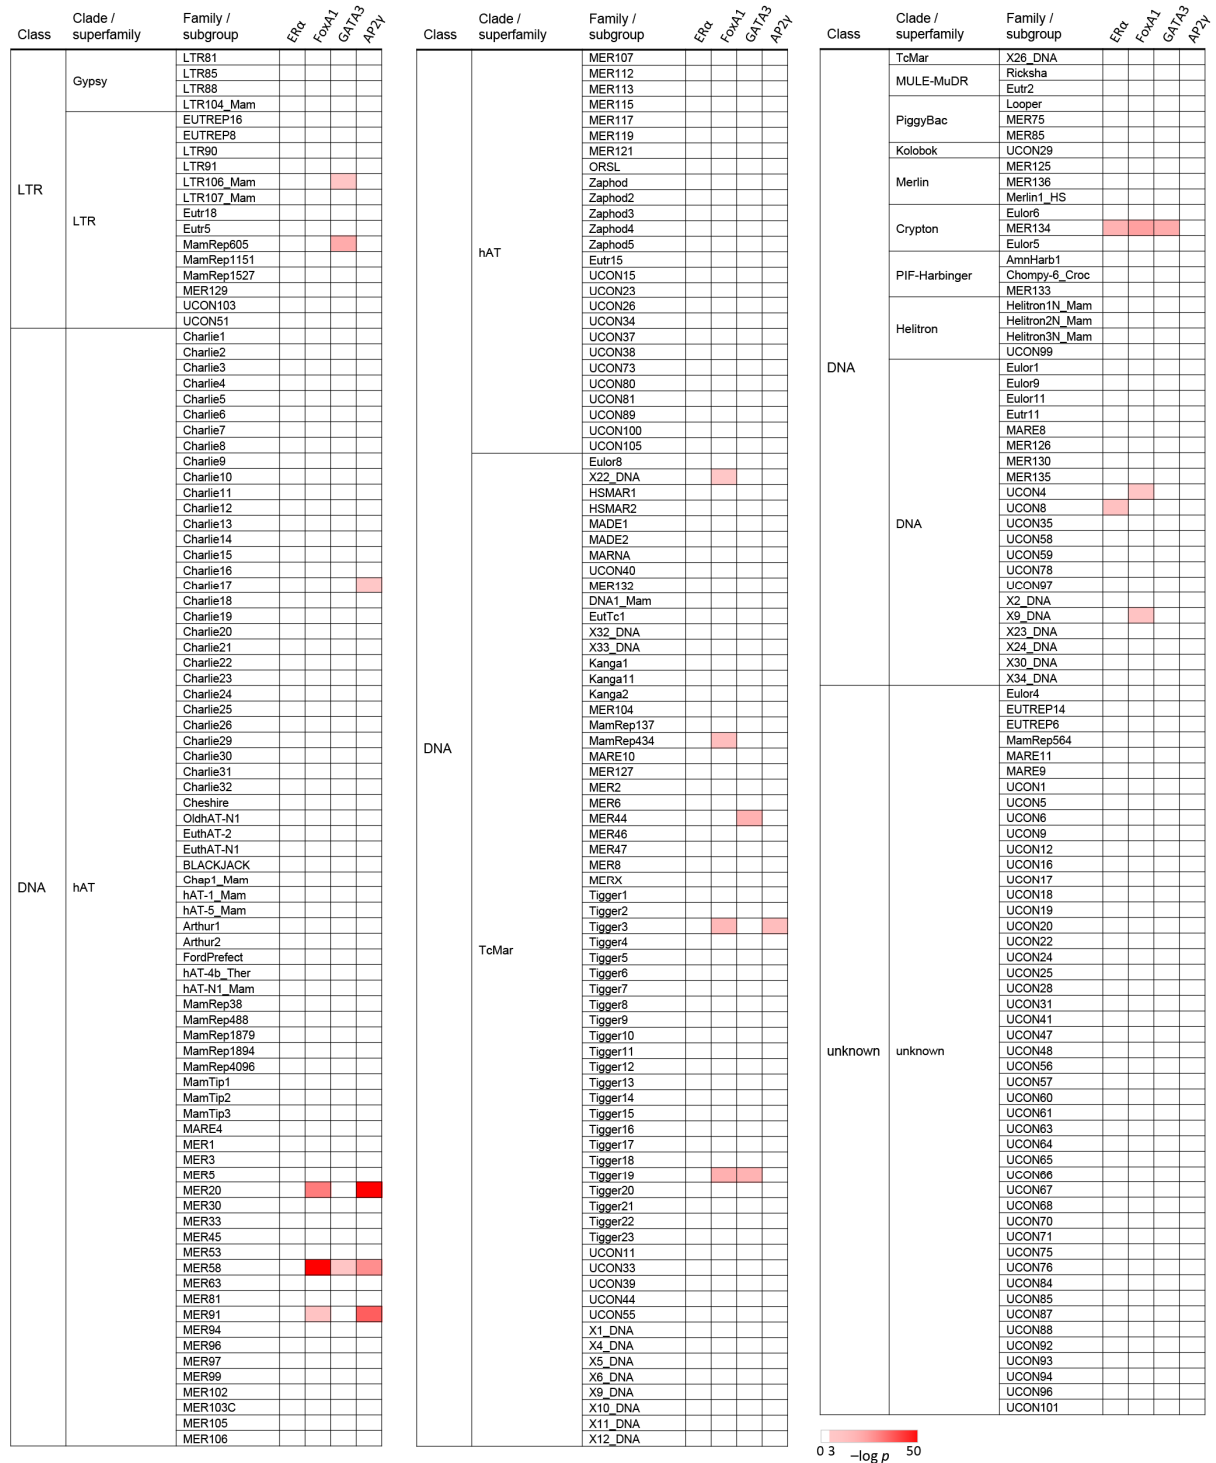

**Figure S3.** Enrichment of the binding events of the four transcription factors within TE families. The heat map represents the Bonferroni-corrected  $-\log p$  for the 536 families of TEs bound by ERα, FoxA1, GATA3, and AP2γ (colored for  $p < 0.001$ , two-sided binomial test,  $n = 2,144$ ).

A

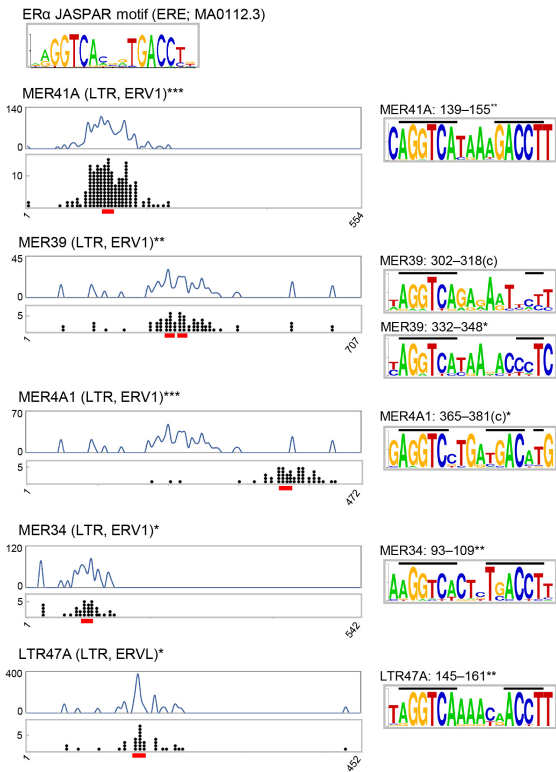

B

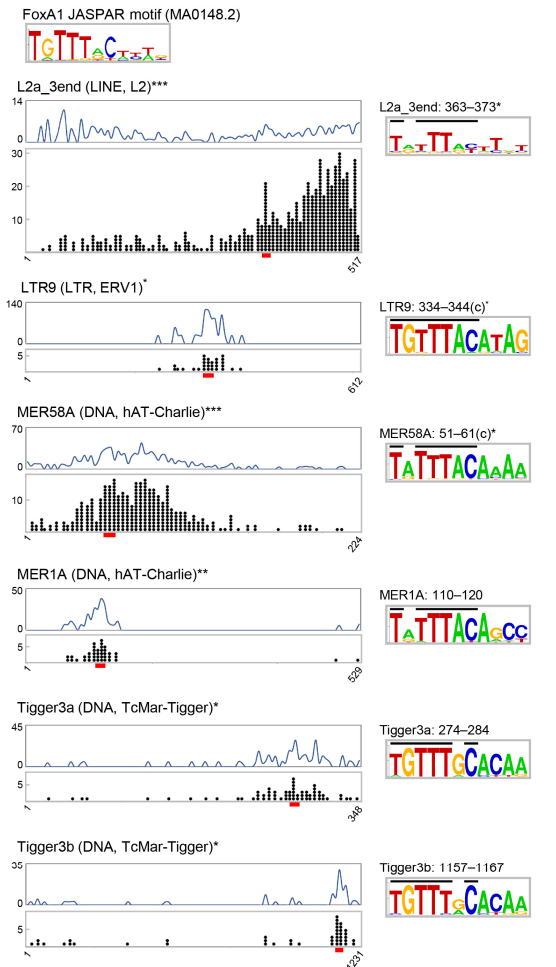

C

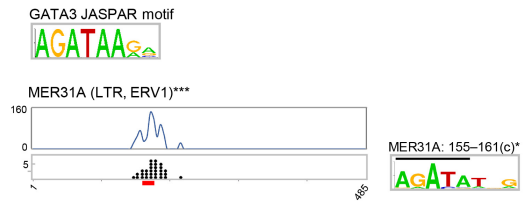

D

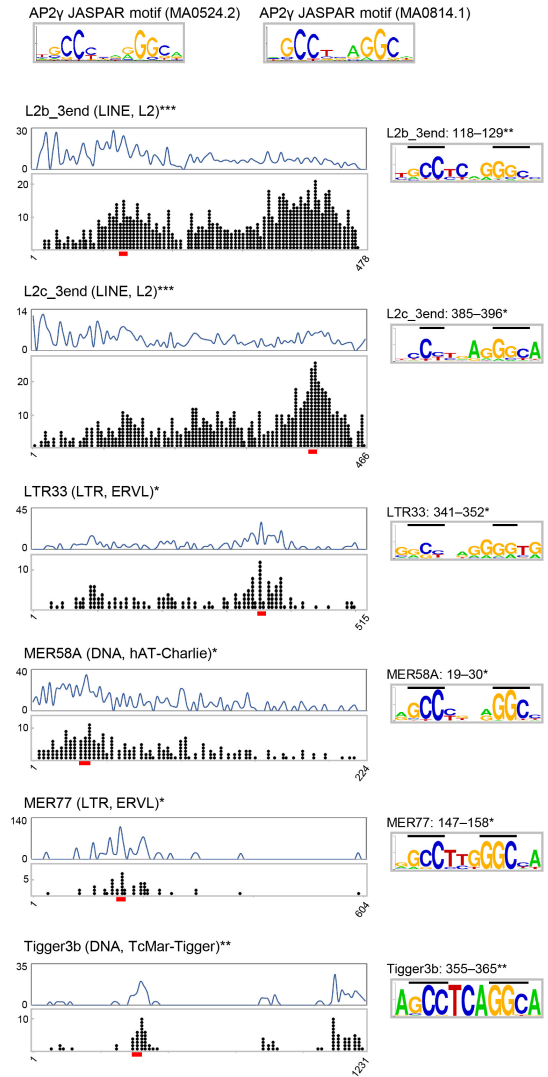

**Figure S4.** Non-uniform distribution of the transcription factor binding sites in TEs that show significant enrichment for binding events in Supplementary Figure S3. **(A–D)** Dot plots represent the binding sites of ER $\alpha$  **(A)**, FoxA1 **(B)**, GATA3 **(C)**, and AP2 $\gamma$  **(D)** corresponding to the TE consensus sequence ( $x$  axis). Proportions of the number of binding events ( $10^{-5}$ ) among all TE copies in the human genome (*i.e.*, normalized distribution of binding sites) are shown above the dot plots. Note that these TEs are significantly enriched among the binding sequences of the factors based on the two-sided binomial test ( $p < 0.001$  with the Bonferroni correction; Supplementary Figure S3). Asterisks to the right of the TE names indicate significantly non-uniform distribution of the binding sites within the TE consensus sequences (two-tailed Fisher's exact test and  $\chi^2$ -test for  $n \leq 100$  and  $n > 100$ , respectively;  $*p < 0.05$ ,  $**p < 10^{-5}$ ,  $***p < 10^{-10}$ ). In the binding peak regions (red lines), binding motifs are found in the TE sequences (sequence logos on the right). Positions of the binding sites (c, reverse-complement) and significant presence of the motif in the TE consensus sequences are shown above the logos ( $*p < 0.05$ ,  $**p < 10^{-5}$ ; FIMO analysis (2)). Horizontal lines in logos represent conserved nucleotides shared with the known JASPAR motifs (shown at top of panel).

A

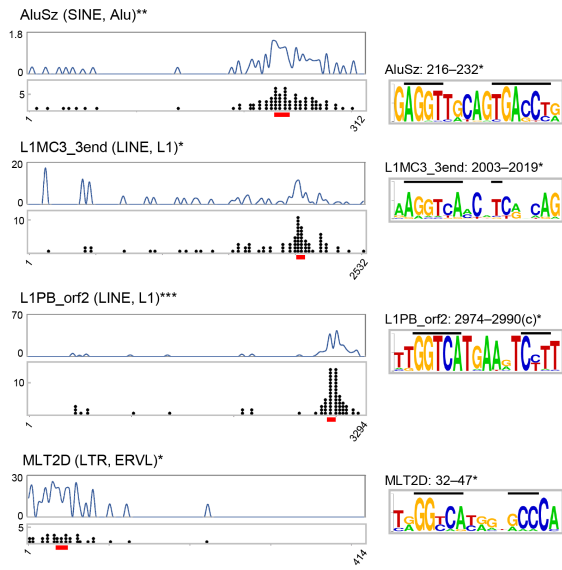

B

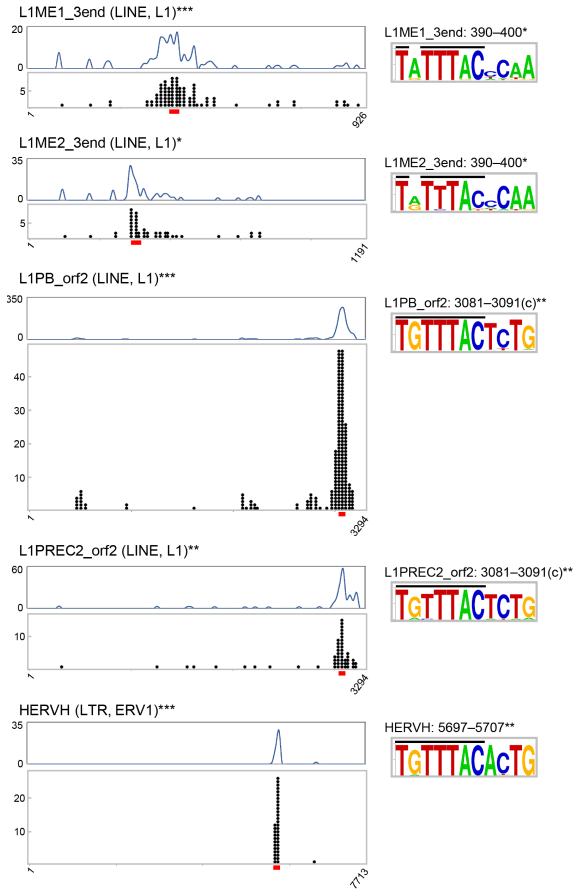

C

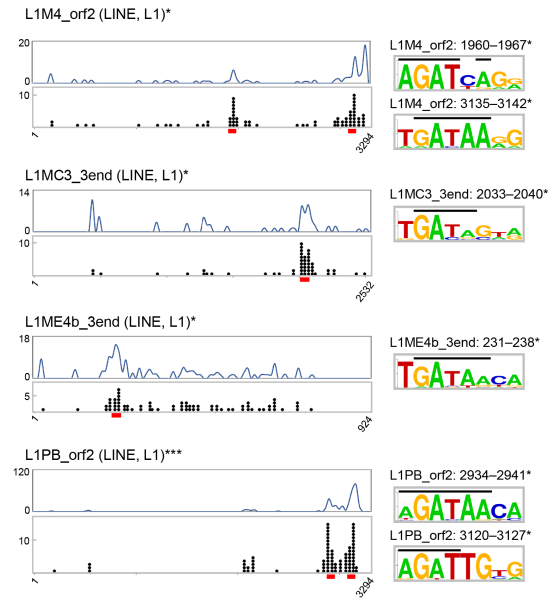

D

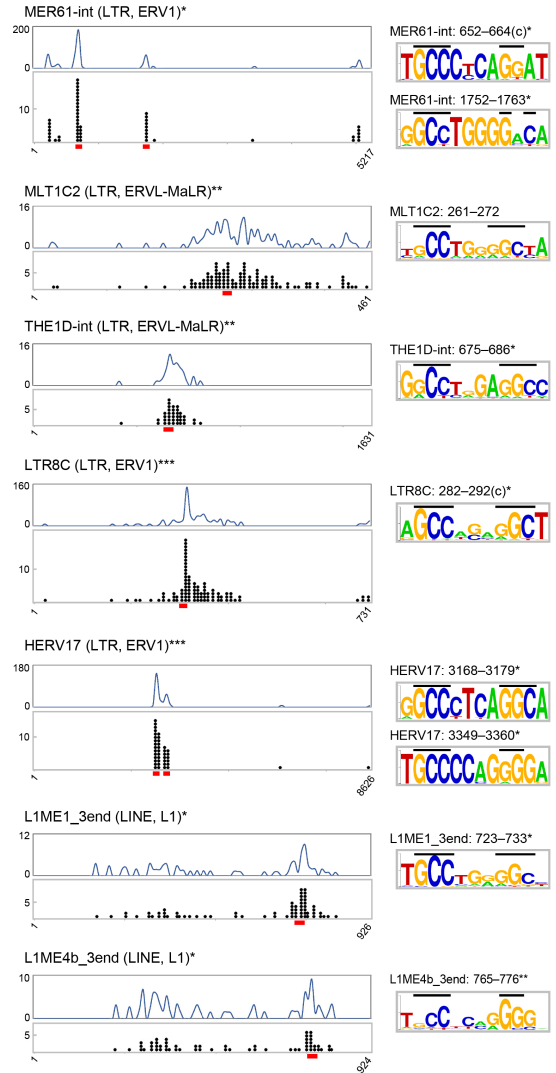



**Figure S5.** Non-uniform distribution of the transcription factor binding sites in TEs that do not show significant enrichment for binding events in Supplementary Figure S3. **(A–D)** Dot plots represent the binding sites of ER $\alpha$  **(A)**, FoxA1 **(B)**, GATA3 **(C)**, and AP2 $\gamma$  **(D)** corresponding to the TE consensus sequence ( $x$  axis), although the TEs did not show a statistically significant enrichment by the binomial test (Supplementary Figure S3). Proportions of the number of binding events ( $10^{-5}$ ) among all TE copies in the human genome (*i.e.*, normalized distribution of binding sites) are shown above the dot plots. Asterisks to the right of the TE names indicate significantly non-uniform distribution of the binding sites within the TE consensus sequences (two-tailed Fisher's exact test and  $\chi^2$ -test for  $n \leq 100$  and  $n > 100$ , respectively;  $*p < 0.05$ ,  $**p < 10^{-5}$ ,  $***p < 10^{-10}$ ). In the binding peak regions (red lines), binding motifs are found in the TE sequences (sequence logos on the right). Positions of the binding sites (c, reverse-complement) and significant presence of the motif in the TE consensus sequences are shown above the logos ( $*p < 0.05$ ,  $**p < 10^{-5}$ ; FIMO analysis (2)). Horizontal lines in logos represent conserved nucleotides shared with the known JASPAR motifs (shown at top of panel).

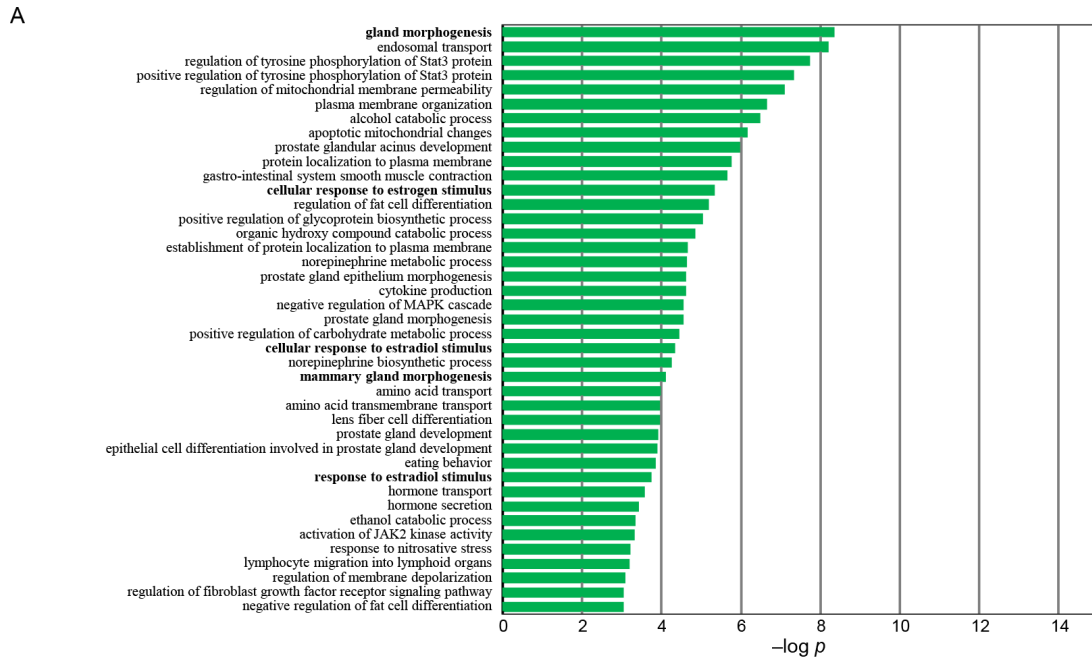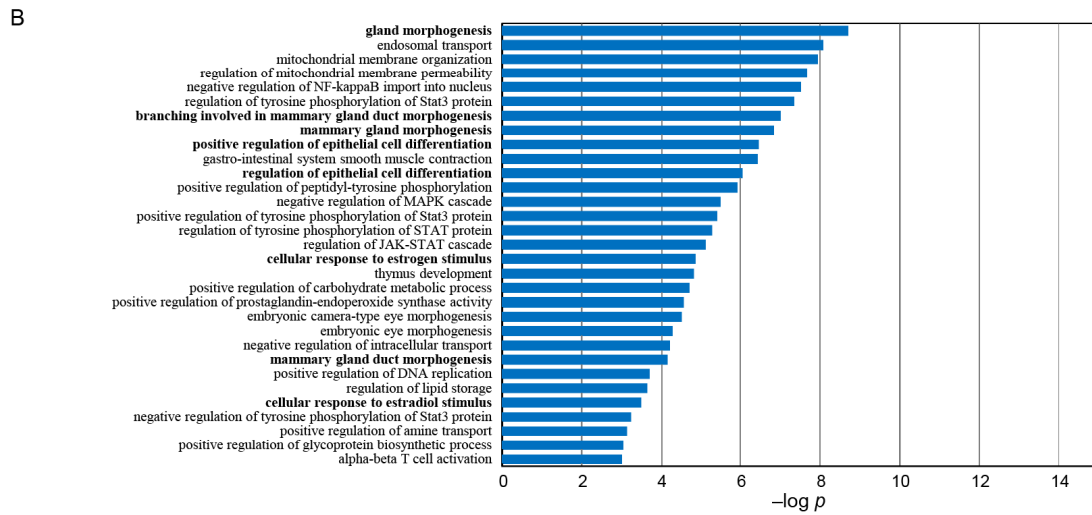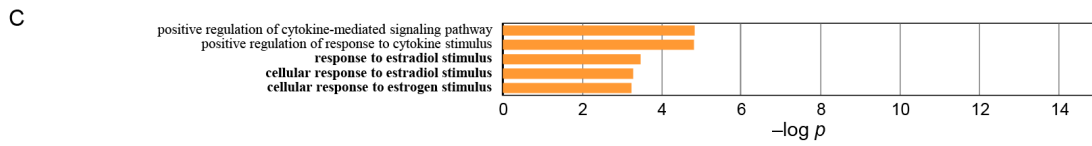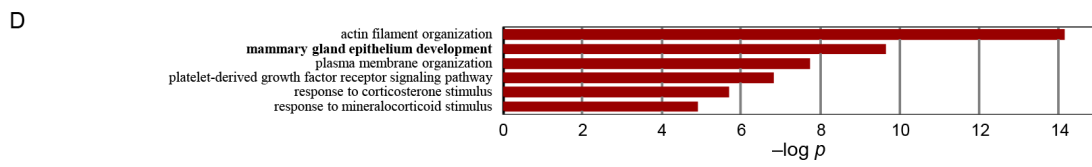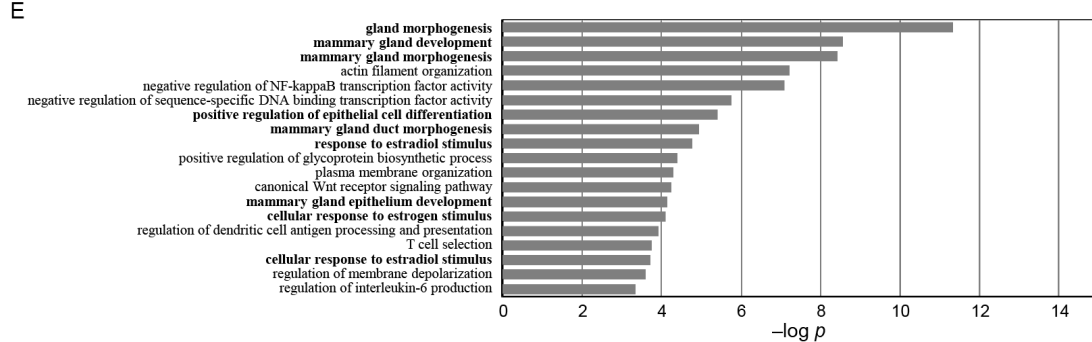

**Figure S6.** Gene ontology analysis for the neighboring genes of the TE-derived *cis*-elements. (**A–E**) Gene ontology analysis was conducted with GREAT (3) for the genes surrounding the TEs that are estimated to function active promoters or strong enhancers (Supplementary Figure S2) bound by ER $\alpha$  (**A**), FoxA1 (**B**), GATA3 (**C**), AP2 $\gamma$  (**D**), and p300 (**E**). Biological terms significantly enriched (>2-fold enrichment,  $p < 0.001$ , and false discovery rate of  $q < 0.05$ ) are shown with the  $-\log p$ . The terms related to mammary gland development and estrogen responses are highlighted in bold.

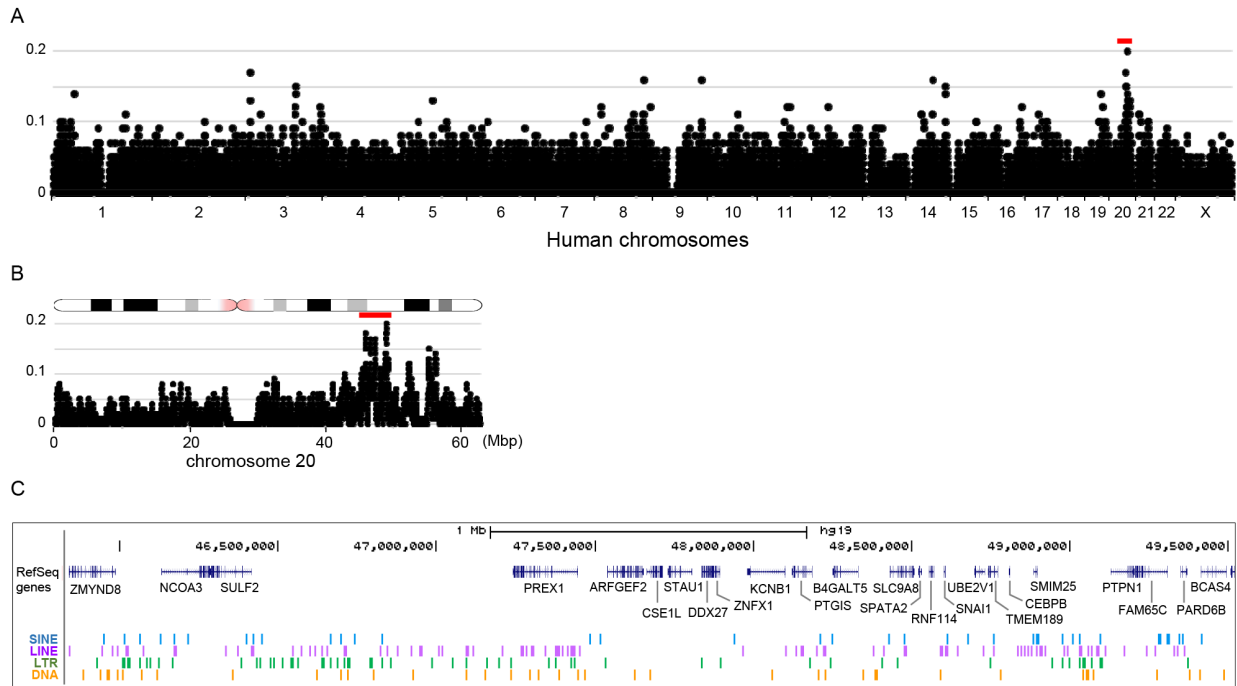

**Figure S7.** Density of TEs bound by these four transcription factors in the human genome. **(A, B)** Density of TEs (copies per kilobase) bound by ER $\alpha$ , FoxA1, GATA3, or AP2 $\gamma$  were calculated in sliding 100-kb windows with 50- and 10-kb steps for **(A)** the entire genome (hg19, excluding chromosome Y) and **(B)** chromosome 20. Red bars denote the region with the highest density. **(C)** RefSeq protein-coding genes and TEs in the 3.7-Mb region (chr20:45,820,001-49,520,000, hg19) showing the highest TE density in **(B)**. Known functions of the 10 genes involved in mammary gland development, ER $\alpha$ -related regulation, or breast cancer are listed in Supplementary Table S1.

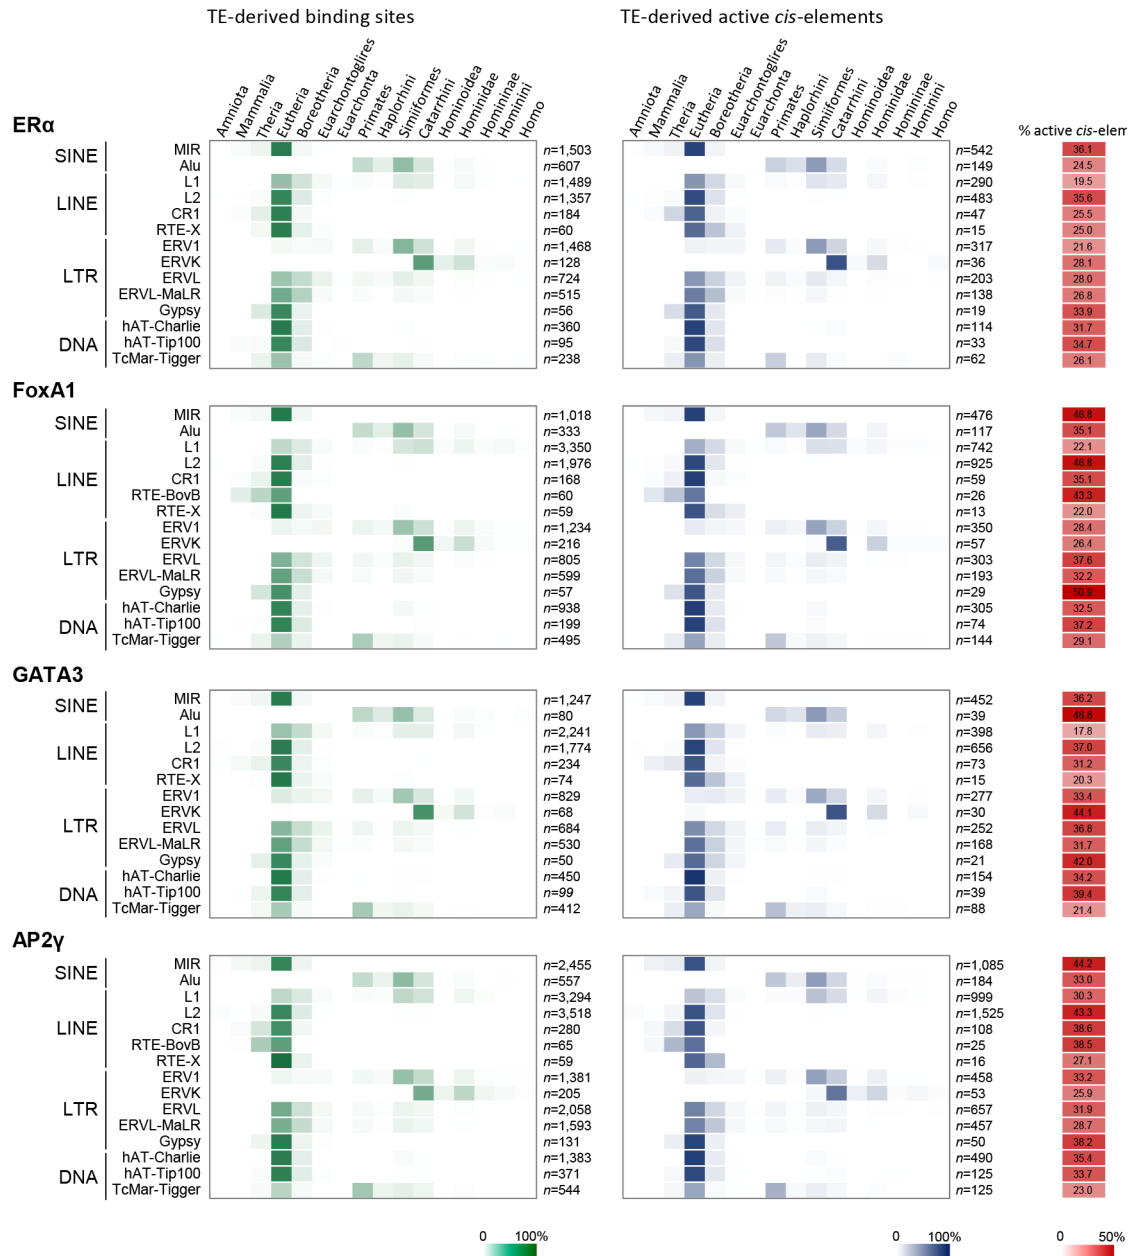

**Figure S8.** Estimated time of acquisition of the transcription factor binding sequences on TEs during mammalian evolution. The proportions of binding sites were represented separately for each TE category for all TE-derived binding sites (green) and those annotated as active *cis*-elements (active promoters or strong enhancers by ChromHMM) (blue). Proportion of the active *cis*-elements among all binding sites are shown in right (red).

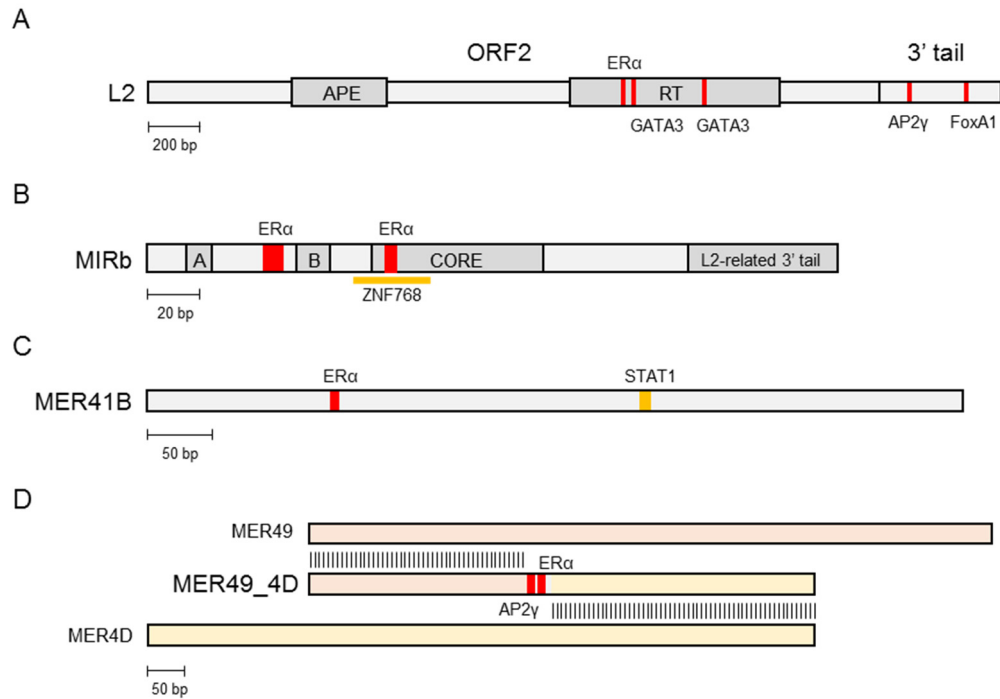

**Figure S9.** Schematic representation of representative ER $\alpha$ -binding TEs. (**A–D**) Positions of the transcription factor binding motifs were mapped on representative TEs shown in Figure 2A: (**A**) L2, (**B**) MIRb, (**C**) MER41B, and (**D**) MER49\_4D. Red bars denote positions of transcription factor binding sites. Alignments of the binding sequences are shown in Supplementary Figure S10. APE, apurinic/aprimidinic endonuclease domain; RT, reverse-transcriptase domain. In (**B**), A and B denote Box A and B of RNA pol III promoters, respectively, and CORE represents the central CORE domain shared among other SINEs in animals (4). Yellow bars in (**B**) and (**C**) represent the position of the ZNF768 and STAT1 binding motifs in MIR (5) and MER41B (6), respectively. In (**D**), note that MER49\_4D is a hybrid LTR of MER49 and MER4D from their former and latter regions, respectively, and the ER $\alpha$  and AP2 $\gamma$  binding motifs are located within the intervening region.

A L2: 1905–2063 bp

ERα

Genomic sequence for ERα, L2: 1905–2063 bp. The sequence is presented in a multi-line format with a red box highlighting a specific region. The sequence is flanked by coordinates 1905 and 2063 bp.

B MIRb: 19–158 bp

ERα

Genomic sequence for MIRb: 19–158 bp. The sequence is presented in a multi-line format with a red box highlighting a specific region. The sequence is flanked by coordinates 19 and 158 bp.

C MIRB: 22-173 bp

ERα

Genomic tracks for MIRB: 22-173 bp and ERα. The top track shows the MIRB sequence with a red box highlighting a region. Below it are multiple tracks of genomic coordinates and sequences, with ERα binding sites indicated by red boxes.

D MER41B: 73-224 bp

ERα

Genomic tracks for MER41B: 73-224 bp and ERα. The top track shows the MER41B sequence with a red box highlighting a region. Below it are multiple tracks of genomic coordinates and sequences, with ERα binding sites indicated by red boxes.

E MER49\_4D: 208-361 bp

ERα

Genomic tracks for MER49\_4D: 208-361 bp and ERα. The top track shows the MER49\_4D sequence with a red box highlighting a region. Below it are multiple tracks of genomic coordinates and sequences, with ERα binding sites indicated by red boxes.



F MER50: 262–415 bp

FoxA1

Genomic sequence for MER50: 262–415 bp with FoxA1 binding sites highlighted in blue. The sequence is presented in a multi-line format with a red box above the FoxA1 binding site motif.

G LTR40a: 15–178 bp

FoxA1

Genomic sequence for LTR40a: 15–178 bp with FoxA1 binding sites highlighted in blue. The sequence is presented in a multi-line format with a red box above the FoxA1 binding site motif.

H L2: 1960–2101 bp

GATA3

Genomic sequence for L2: 1960–2101 bp with GATA3 binding sites highlighted in blue. The sequence is presented in a multi-line format with a red box above the GATA3 binding site motif.

I L2: 2318–2457 bp

GATA3

Genomic sequence for L2: 2318–2457 bp with GATA3 binding sites highlighted in blue. The sequence is presented in a multi-line format with a red box above the GATA3 binding site motif.

J LTR40a: 81–171 bp

GATA3

Genomic sequence for LTR40a: 81–171 bp with GATA3 binding sites highlighted in blue. The sequence is presented in a multi-line format with a red box above the GATA3 binding site motif.



**L** L2a\_3end: 343–516 bp

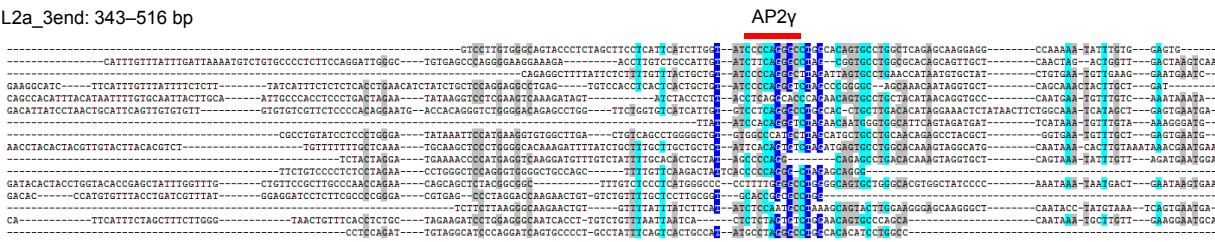

**M** LTR16C: 29–180 bp

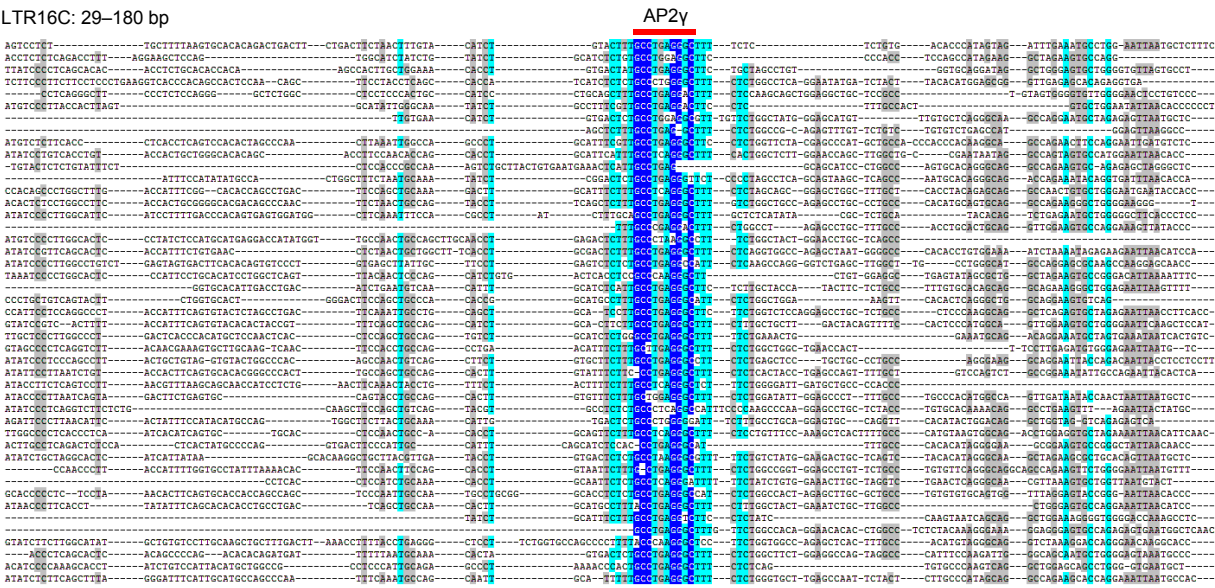

**N** MER49\_4D: 193–328 bp

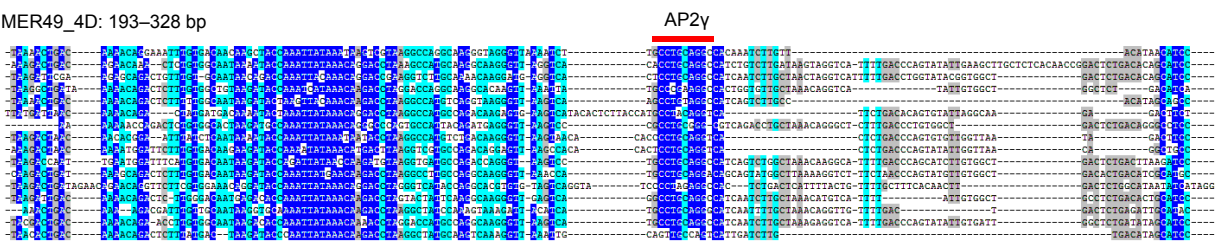

**Figure S10.** Alignments of TE sequences bound by transcription factors. (A–E) ER $\alpha$ , (F–G) FoxA1, (H–J) GATA3, and (K–N) AP2 $\gamma$ . Locations of these binding sites on the consensus sequence show the explicit peaks as in Fig. 2. Blue, light blue, and grey backgrounds represent >90%, >75%, and >60% shared nucleotides among the sequences, respectively. Conserved binding motifs are shown by red bars.



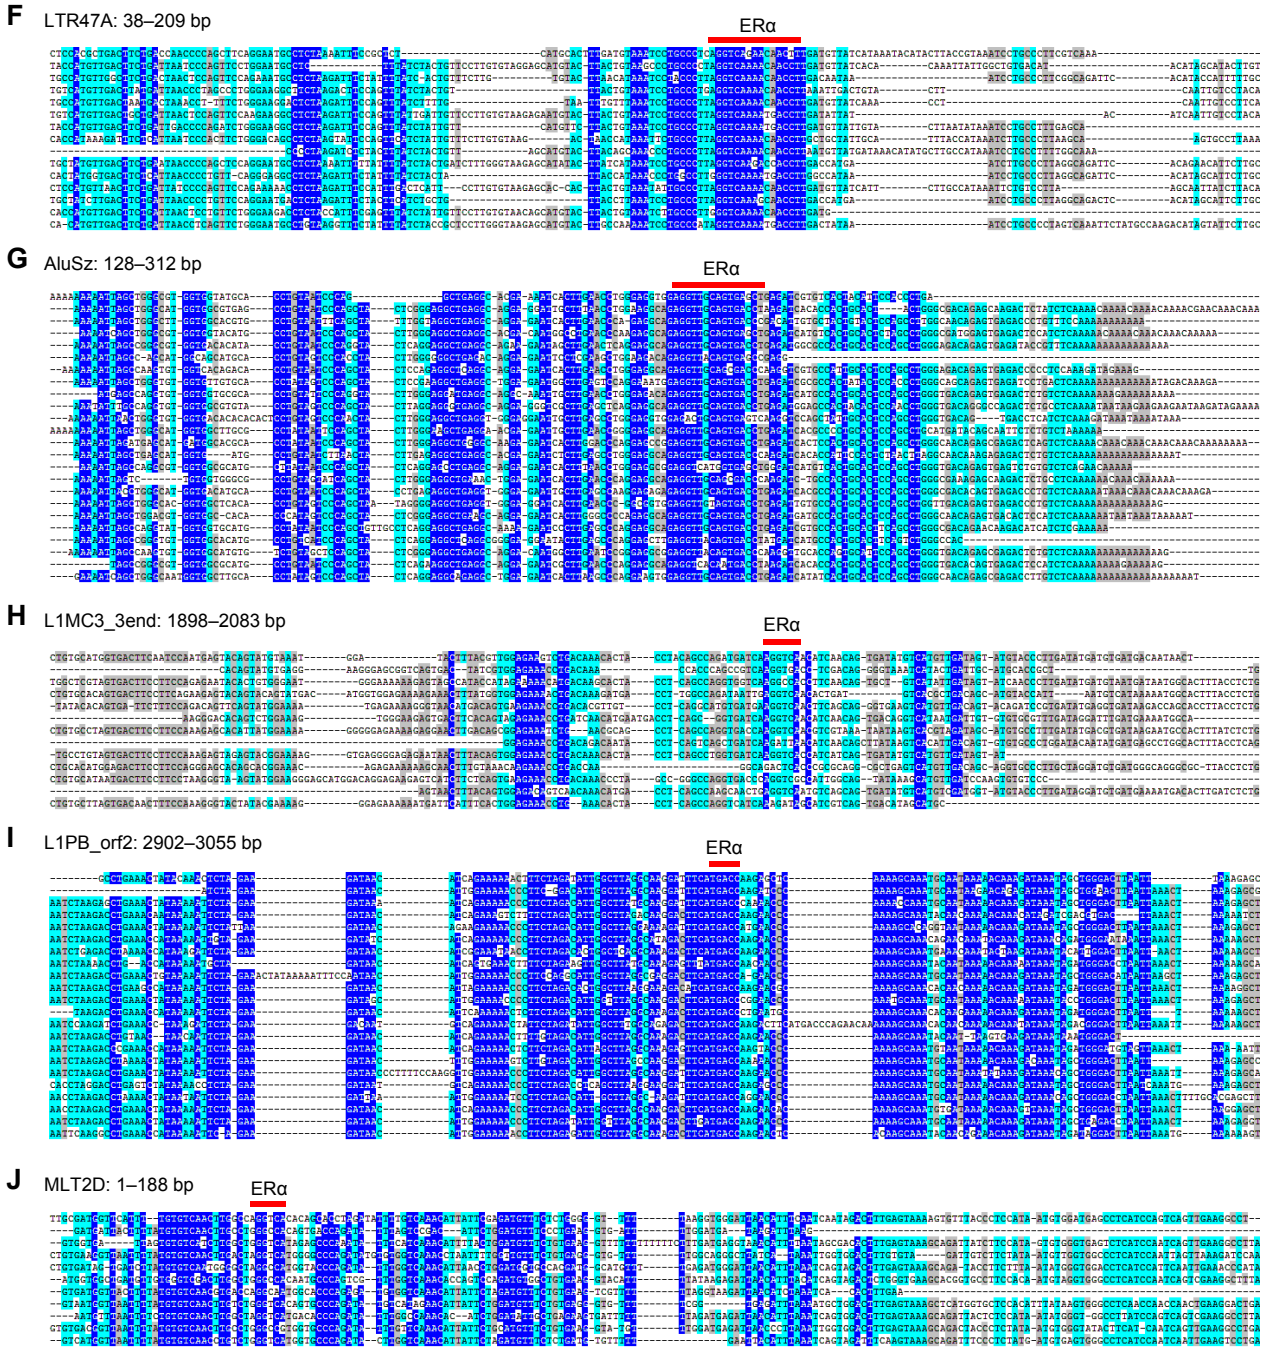

**Figure S11.** Alignments of TE sequences with ERα binding sites from Figures S4 and S5. Blue, light blue, and grey backgrounds represent >90%, >75%, and >60% shared nucleotides among the sequences, respectively. Conserved binding motifs are shown by red bars.

A L2a\_3end: 302-442 bp

FoxA1

Genomic coordinates and sequence for L2a\_3end: 302-442 bp. The FoxA1 binding site is highlighted in red. The sequence is shown in a multi-line format with coordinates on the left and right.

B LTR9: 267-415 bp

FoxA1

Genomic coordinates and sequence for LTR9: 267-415 bp. The FoxA1 binding site is highlighted in red. The sequence is shown in a multi-line format with coordinates on the left and right.

C MER58A: 1-136 bp

FoxA1

Genomic coordinates and sequence for MER58A: 1-136 bp. The FoxA1 binding site is highlighted in red. The sequence is shown in a multi-line format with coordinates on the left and right.







**K** L1PREC2\_orf2: 3029–3182 bp

**FoxA1**

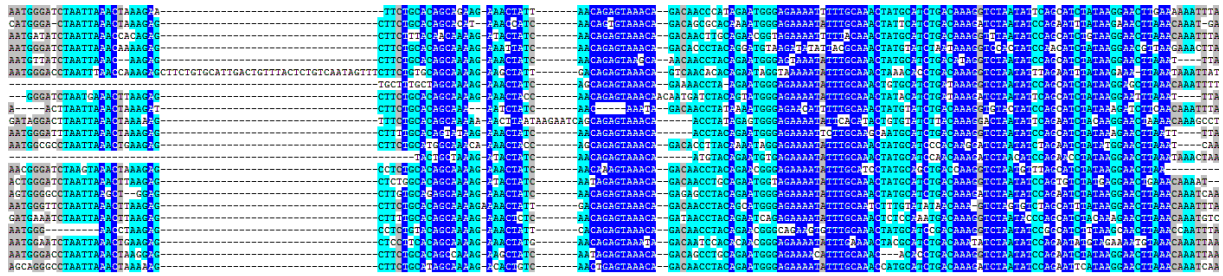

**L** HERVH: 5632–5794 bp

**FoxA1**

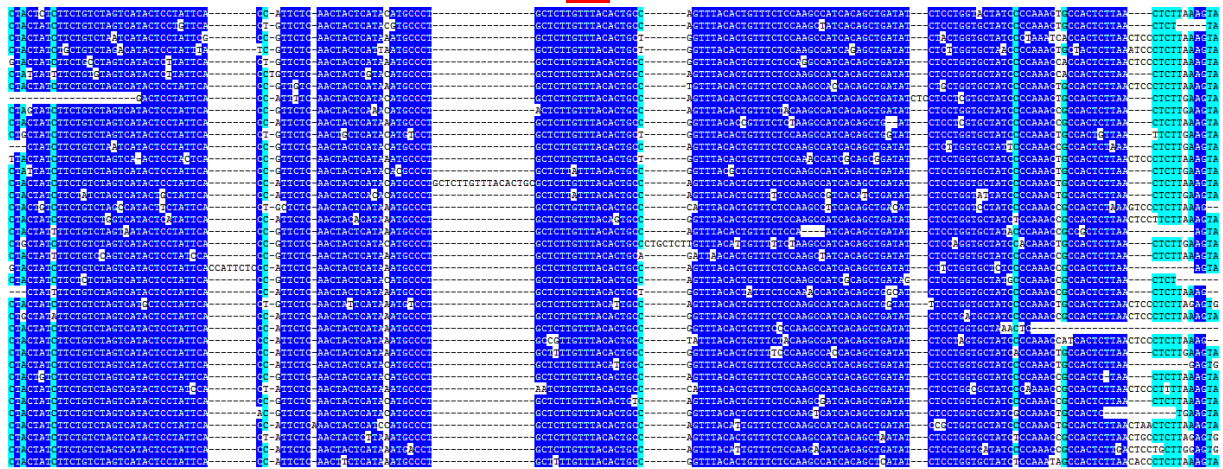

**Figure S12.** Alignments of the TE sequences with FoxA1 binding sites from Figures S4 and S5. Blue, light blue, and grey backgrounds represent >90%, >75%, and >60% shared nucleotides among the sequences, respectively. Conserved binding motifs are shown by red bars.

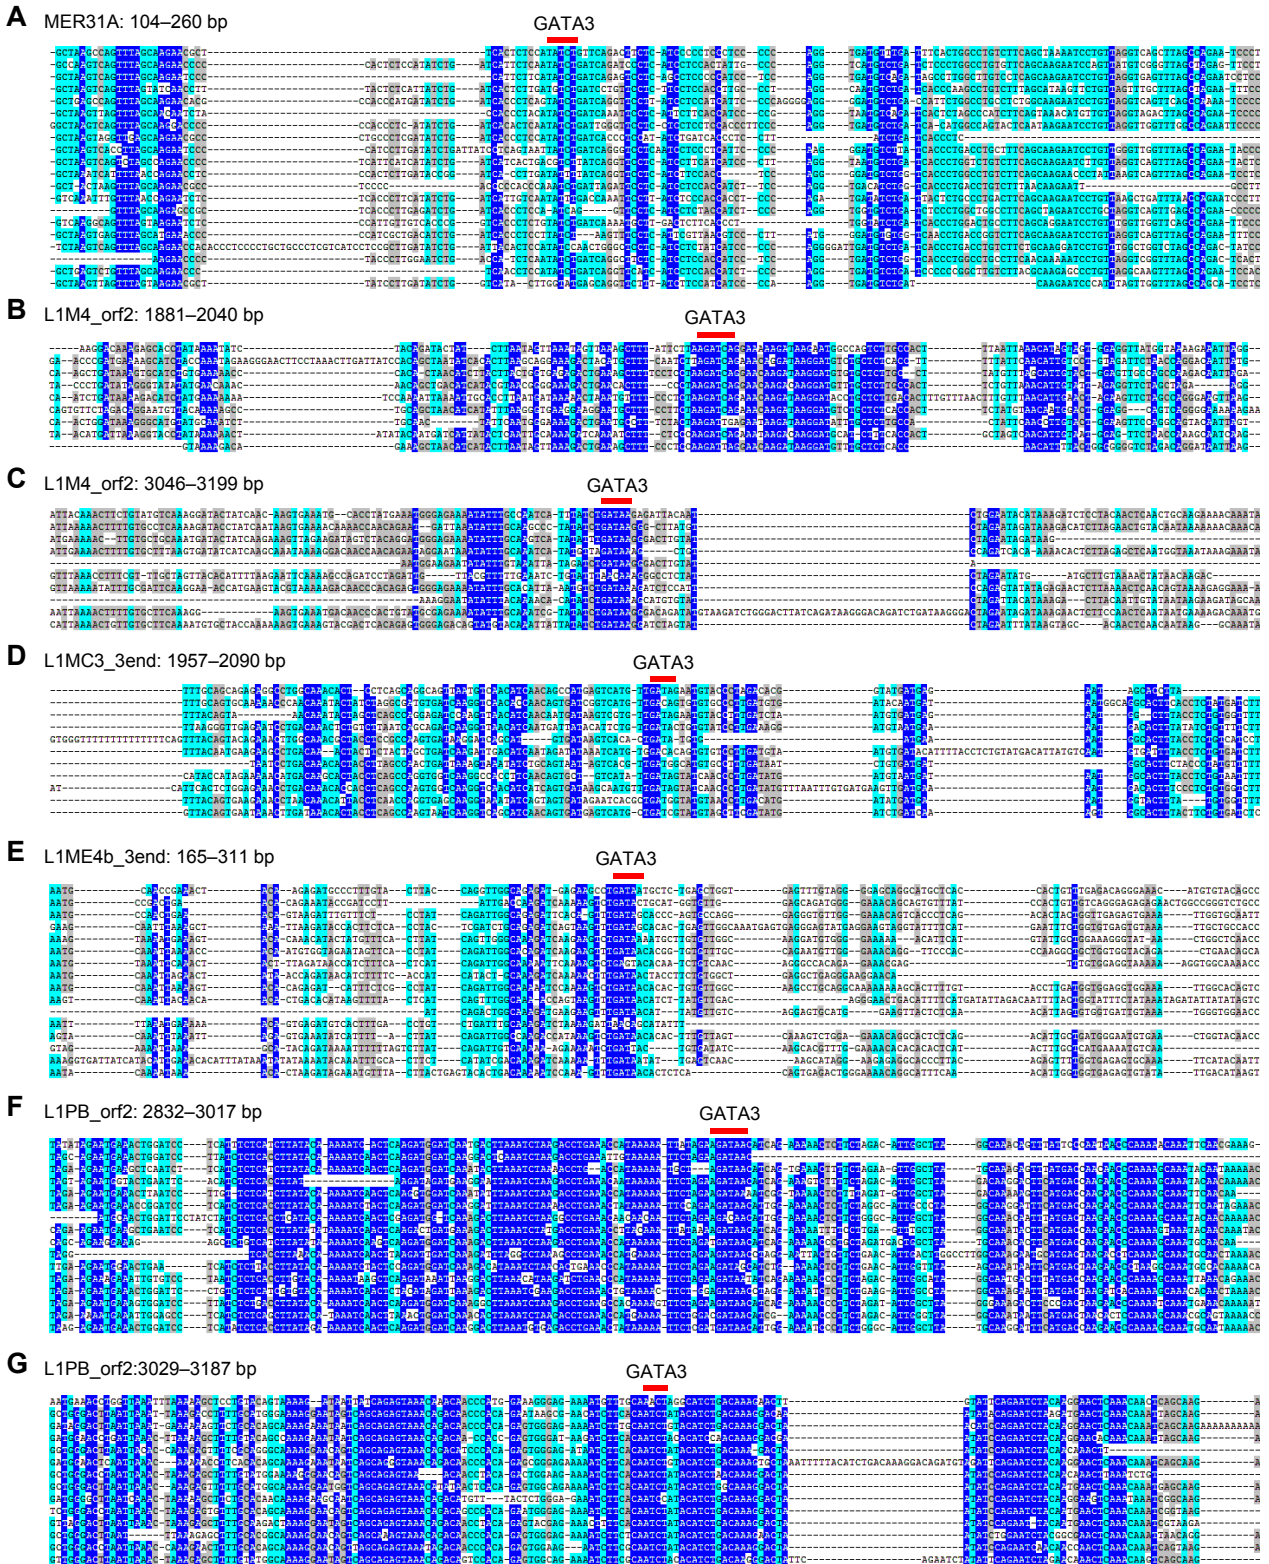

**Figure S13.** Alignments of TE sequences with GATA3 binding sites from Figures S4 and S5. Blue, light blue, and grey backgrounds represent >90%, >75%, and >60% shared nucleotides among the sequences, respectively. Conserved binding motifs are shown by red bars.

A L2b\_3end: 39-191 bp

AP2γ

Genomic sequence alignment for AP2γ (L2b\_3end: 39-191 bp). The sequence is presented in multiple lines with a red box highlighting a specific region. The alignment shows the sequence in both forward and reverse orientations.

B L2b\_3end: 301-466 bp

AP2γ

Genomic sequence alignment for AP2γ (L2b\_3end: 301-466 bp). The sequence is presented in multiple lines with a red box highlighting a specific region. The alignment shows the sequence in both forward and reverse orientations.

C L2c\_3end: 325-475 bp

AP2γ

Genomic sequence alignment for AP2γ (L2c\_3end: 325-475 bp). The sequence is presented in multiple lines with a red box highlighting a specific region. The alignment shows the sequence in both forward and reverse orientations.

D LTR33: 275-459 bp

AP2y

Genomic sequence for LTR33: 275-459 bp. The AP2y binding site is highlighted in red. The sequence is shown in reverse and forward orientations.

E MER58A: 1-153 bp

AP2y

Genomic sequence for MER58A: 1-153 bp. The AP2y binding site is highlighted in red. The sequence is shown in reverse and forward orientations.

F MER77: 69-216 bp

AP2y

Genomic sequence for MER77: 69-216 bp. The AP2y binding site is highlighted in red. The sequence is shown in reverse and forward orientations.

G Tigger3b: 279-456 bp

AP2y

Genomic sequence for Tigger3b: 279-456 bp. The AP2y binding site is highlighted in red. The sequence is shown in reverse and forward orientations.

H MER61-int: 543-773 bp

AP2y

Genomic sequence for MER61-int: 543-773 bp. The AP2y binding site is highlighted in red. The sequence is shown in reverse and forward orientations.



M HERV17: 3112–3279 bp

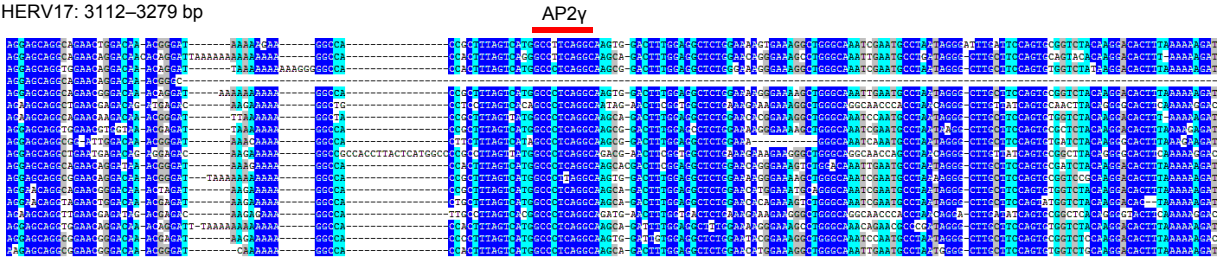

N HERV17: 3279–3464 bp

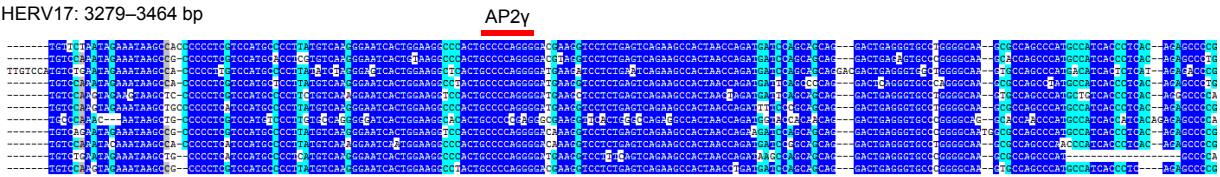

O L1ME1\_3end: 640–795 bp

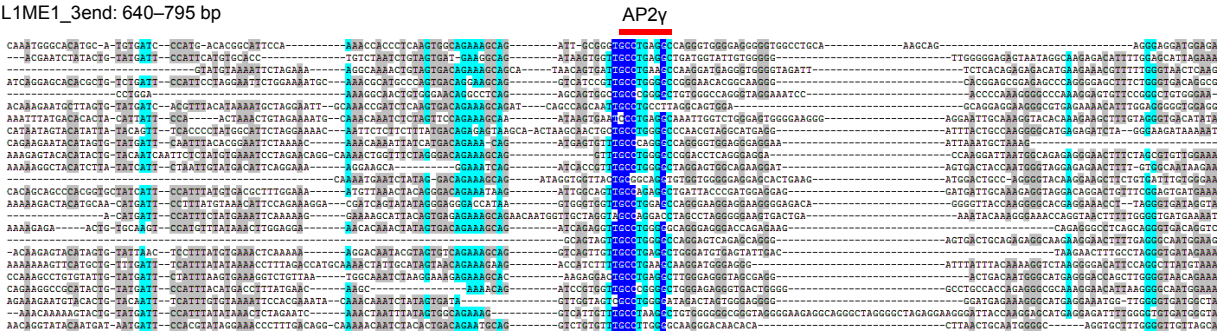

P L1ME4b\_3end: 684–853 bp

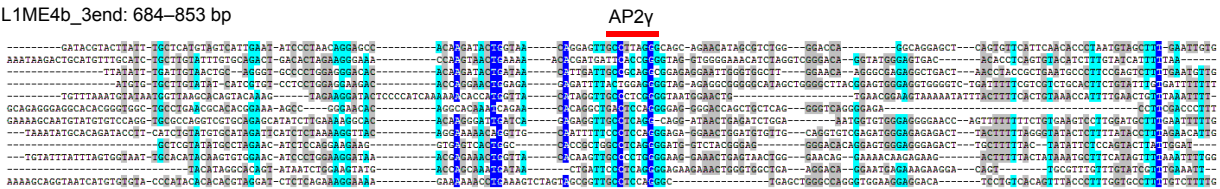

Figure S14. Alignments of TE sequences with AP2 $\gamma$  binding sites from Figures S4 and S5. Blue, light blue, and grey backgrounds represent >90%, >75%, and >60% shared nucleotides among the sequences, respectively. Conserved binding motifs are shown by red bars.

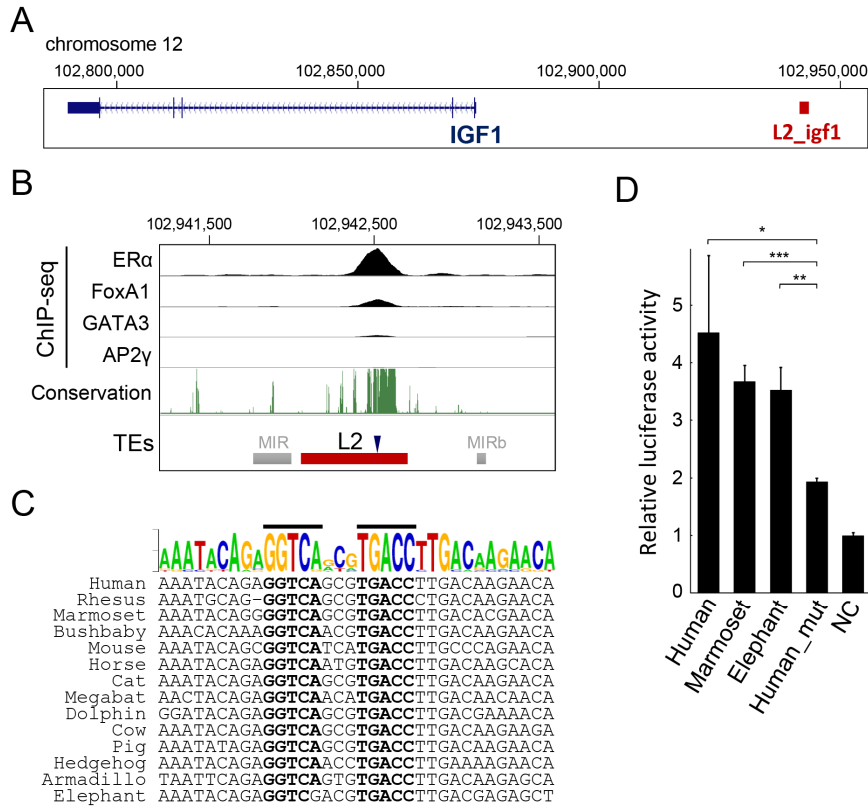

**Figure S15.** Enhancer function of an ER $\alpha$ -binding L2 element. **(A)** Location of the L2 locus (red) upstream of *Igf1* in human chromosome 12. **(B)** ChIP-seq peaks for ER $\alpha$  and the three pioneer factors (7–9) (min=0, max=150) as well as phastCons evolutionary conservation (from the UCSC Genome Browser; min=0, max=1.0). **(C)** Conservation of the ER $\alpha$  binding motif (bold) among eutherians in the L2 sequence denoted by an arrowhead in **(B)**. **(D)** Relative luciferase activity of the human, marmoset, and elephant L2 sequences in MCF-7 cells. Human\_mut represents the human sequence with a mutation in the ER $\alpha$  binding site. Data are shown as the mean  $\pm$  SD (n = 3). Two-tailed t-test: \* $p$  < 0.05, \*\* $p$  < 0.01, \*\*\* $p$  < 0.001. NC, negative control.





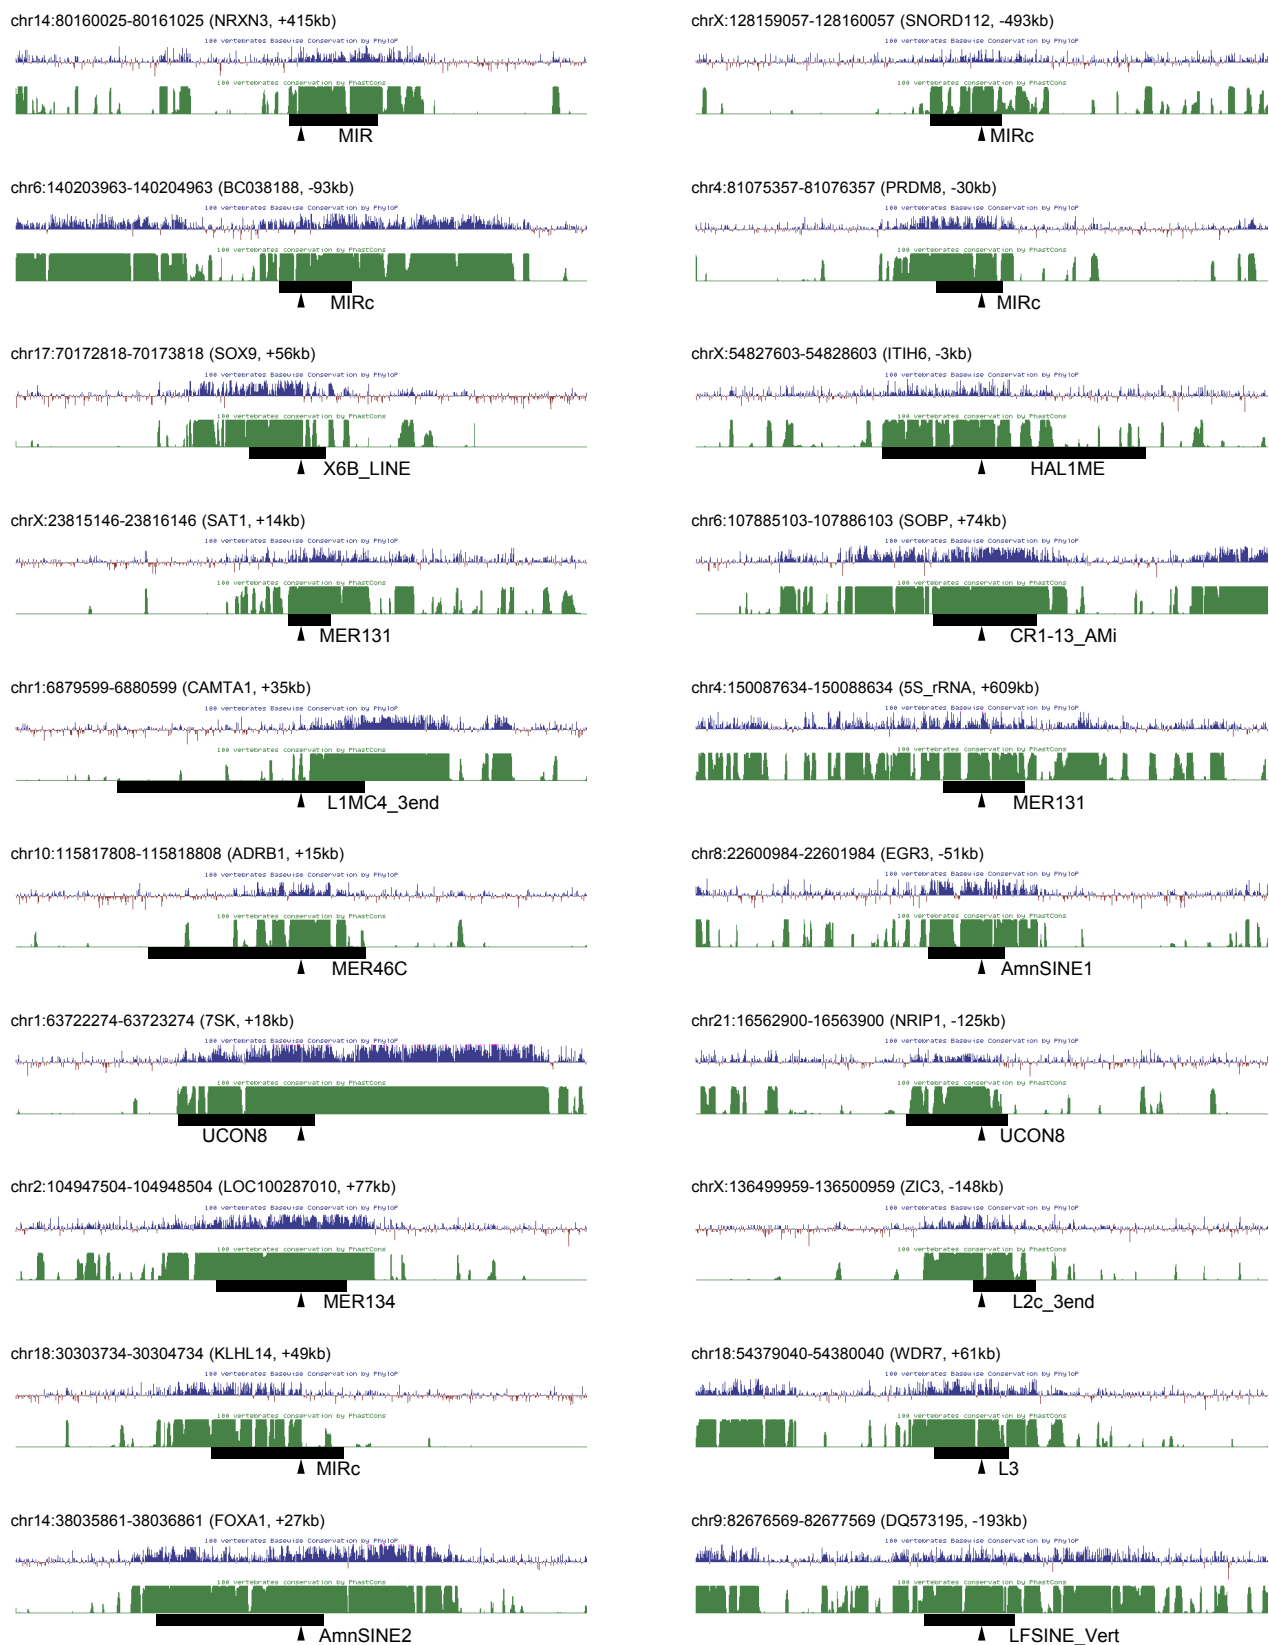

**Figure S17.** Representative TE-derived conserved regions bound by ER $\alpha$ . Bars and arrowheads indicate TEs and the ER $\alpha$ -binding sites, respectively. PhyloP (blue) and phastCons (green) conservation data were retrieved from the UCSC Genome Browser. The nearest gene and the distance are shown in parenthesis.

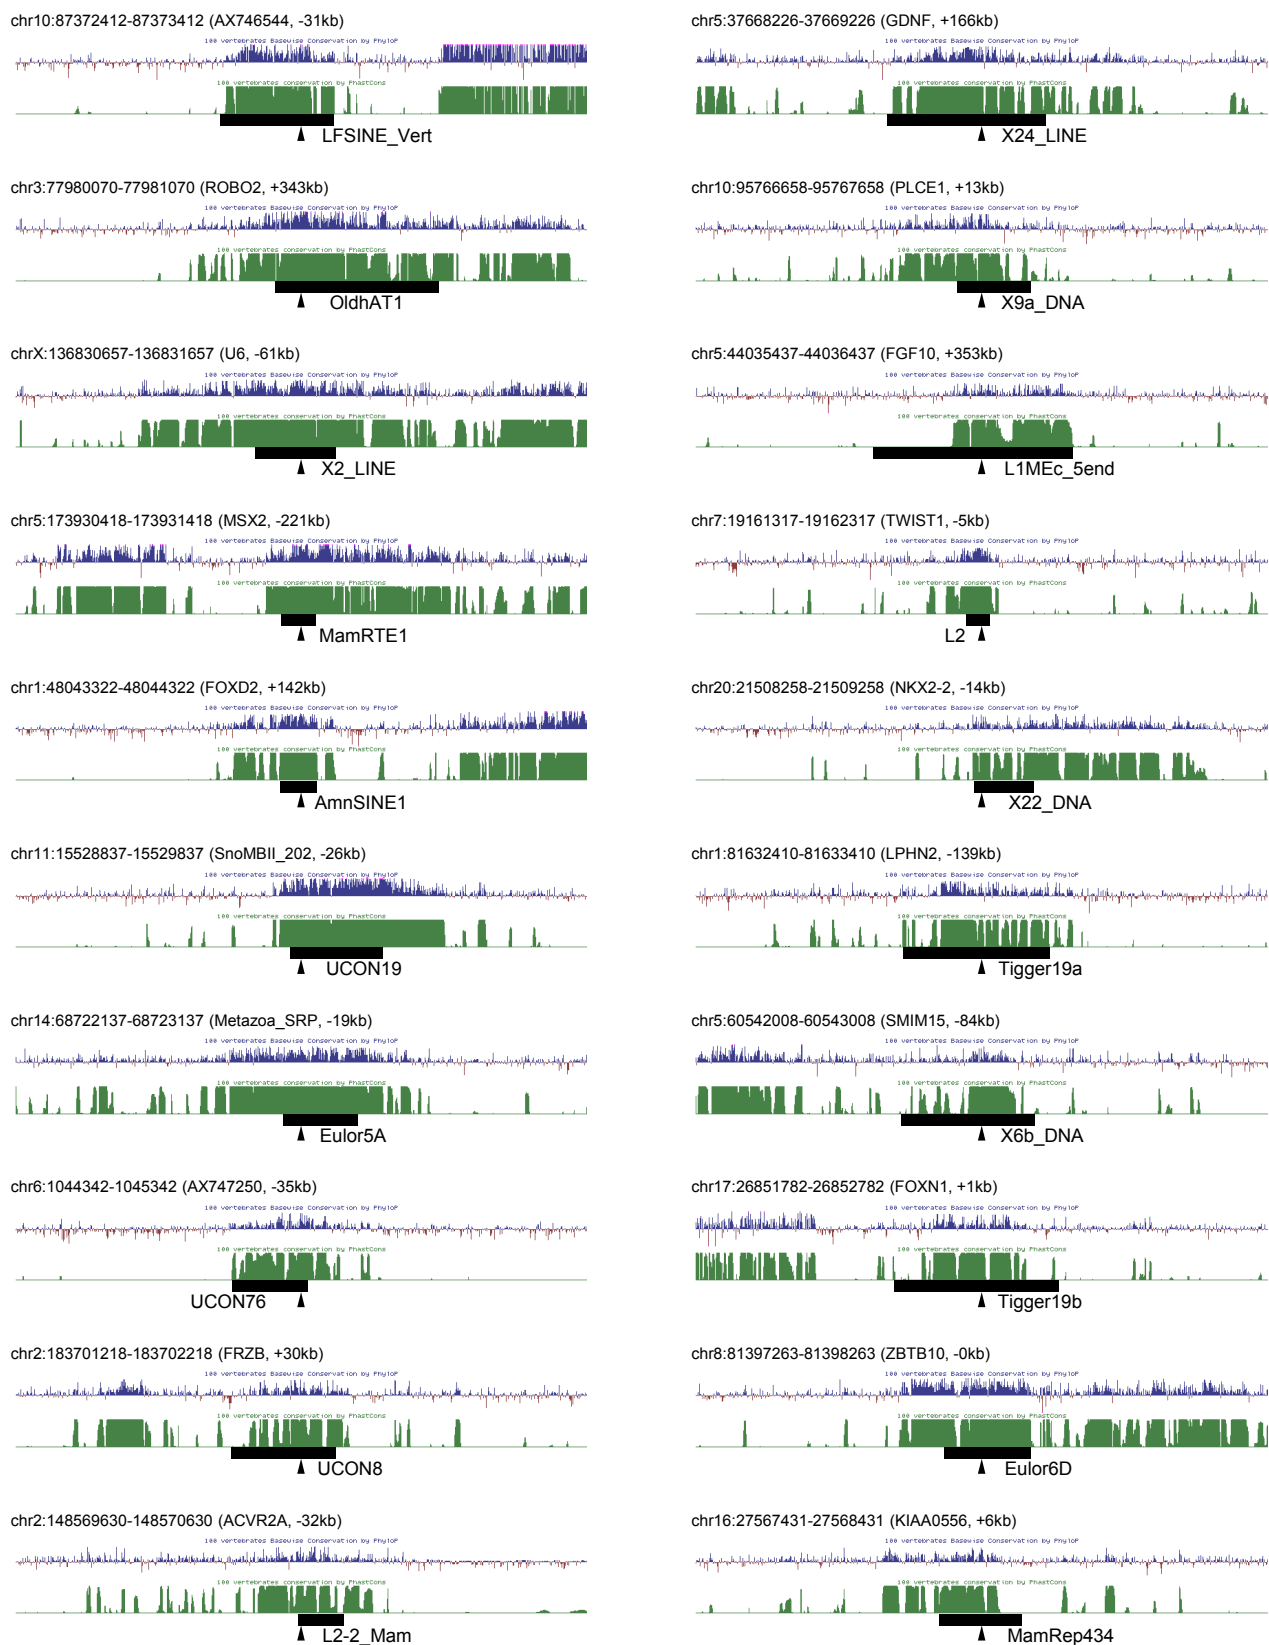

**Figure S18.** Representative TE-derived conserved regions bound by FoxA1. Bars and arrowheads indicate TEs and the FoxA1-binding sites, respectively. PhyloP (blue) and phastCons (green) conservation data were retrieved from the UCSC Genome Browser. The nearest gene and the distance are shown in parenthesis.

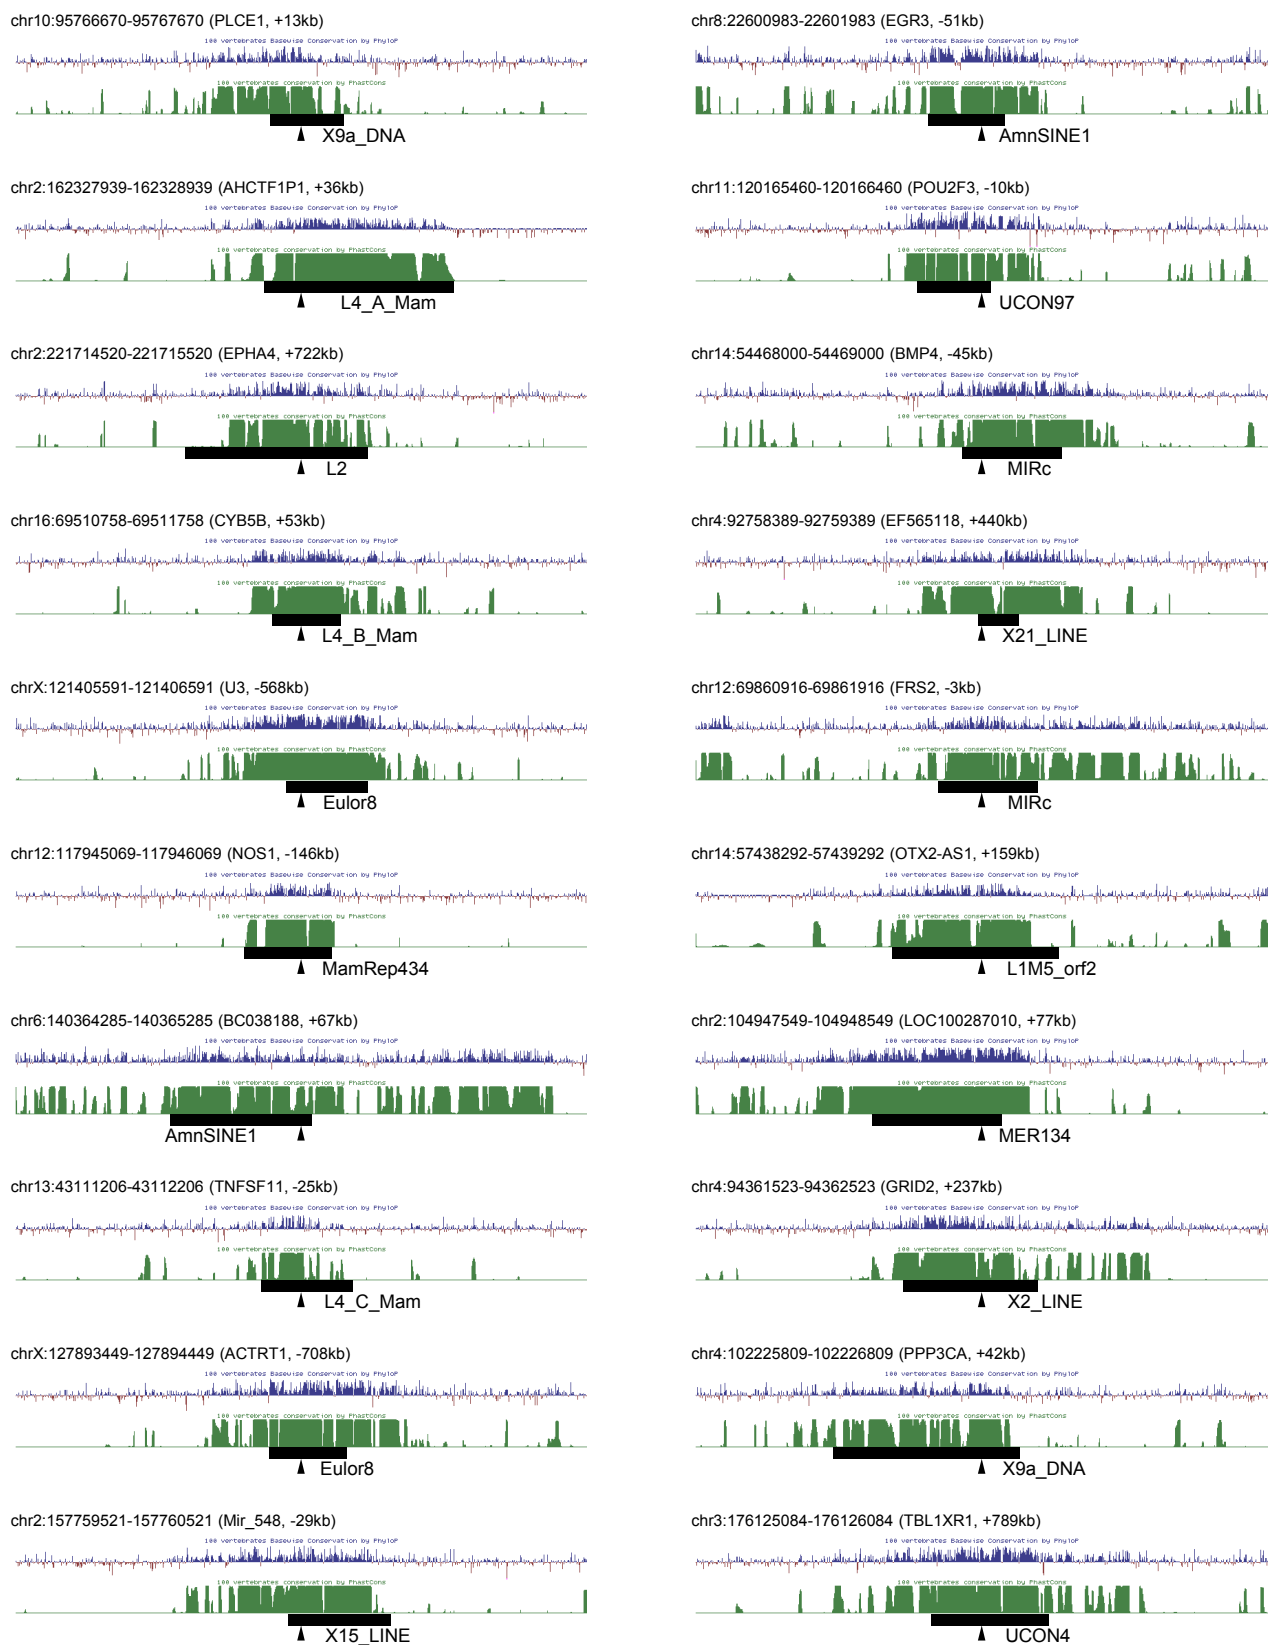

**Figure S19.** Representative TE-derived conserved regions bound by GATA3. Bars and arrowheads indicate TEs and the GATA3-binding sites, respectively. PhyloP (blue) and phastCons (green) conservation data were retrieved from the UCSC Genome Browser. The nearest gene and the distance are shown in parenthesis.

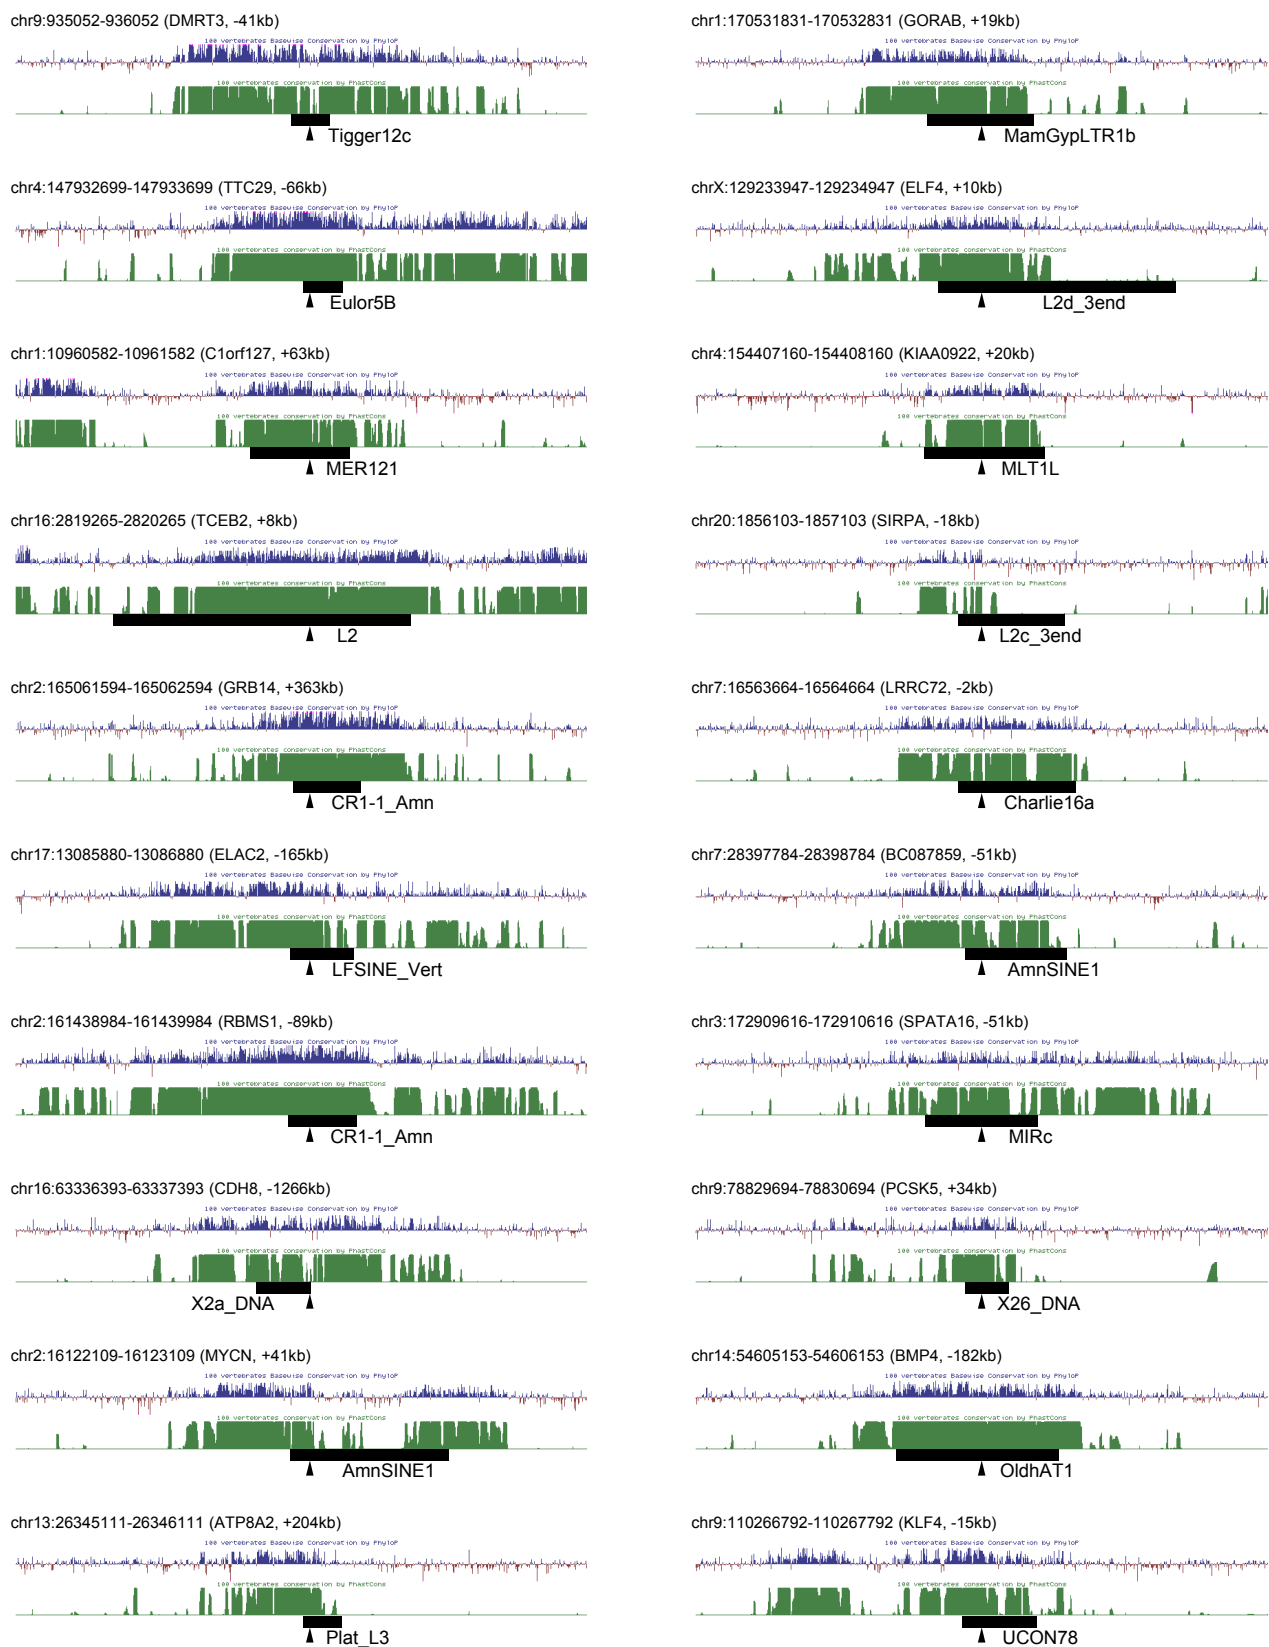

**Figure S20.** Representative TE-derived conserved regions bound by AP2 $\gamma$ . Bars and arrowheads indicate TEs and the AP2 $\gamma$ -binding sites, respectively. PhyloP (blue) and phastCons (green) conservation data were retrieved from the UCSC Genome Browser. The nearest gene and the distance are shown in parenthesis.

**Table S1.** Ten genes with known functions related to mammary gland development or breast cancer located within the region of highest TE density in human chromosome 20.

| Gene          | Location in human (hg19) | Function related to mammary gland or breast cancer                                                                                                                                                                                               |
|---------------|--------------------------|--------------------------------------------------------------------------------------------------------------------------------------------------------------------------------------------------------------------------------------------------|
| <i>ZMYND8</i> | chr20:45837858-45985633  | ZMYND8 forms a complex with ER $\alpha$ and is involved in estrogen-induced transcriptional activation (10).                                                                                                                                     |
| <i>NCOA3</i>  | chr20:46130600-46285621  | <i>Ncoa3</i> , also known as <i>Src-3</i> , is required for female reproductive function and normal mammary gland development, as revealed from the knockout mouse analysis (11). Human <i>Ncoa3</i> is associated with breast cancer risk (12). |
| <i>SULF2</i>  | chr20:46286149-46414808  | Upregulated expression in mammary gland tumours (13).                                                                                                                                                                                            |
| <i>PREX1</i>  | chr20:47240792-47444420  | High-frequency mutations are found in <i>PREX1</i> from human breast cancers (14).                                                                                                                                                               |
| <i>STAU1</i>  | chr20:47729875-47804907  | Nuclear interactome analysis suggests a possible preeminent role for STAU1 in the ER $\alpha$ network (15).                                                                                                                                      |
| <i>ZNFX1</i>  | chr20:47862438-47894756  | <i>Zfas1</i> , an antisense long non-coding RNA to <i>Znfx1</i> , plays an important role in alveolar development and epithelial cell differentiation in the mammary gland (16).                                                                 |
| <i>SNAI1</i>  | chr20:48599512-48605420  | <i>Snai1</i> , also known as <i>Snail1</i> , is involved in branching morphogenesis of mammary epithelial tissues (17).                                                                                                                          |
| <i>CEBPB</i>  | chr20:48807119-48809227  | <i>Cebpb</i> is essential for ductal morphogenesis and epithelial cell proliferation during mammary gland development (18–20).                                                                                                                   |
| <i>PTPN1</i>  | chr20:49126857-49201300  | <i>Ptpn1</i> is involved in the regulation of mammary alveologenesis and the expression of milk proteins (21), as well as mammary tumorigenesis (22).                                                                                            |
| <i>BCAS4</i>  | chr20:49411430-49493714  | <i>BCAS4</i> is overexpressed in breast cancers (23) and forms a fusion transcript with <i>BCAS3</i> (24).                                                                                                                                       |

**Table S2.** NCBI SRA accession numbers used in this study.

| Transcription factor | ChIP                                                        | Control (input)                                     | Ref. |
|----------------------|-------------------------------------------------------------|-----------------------------------------------------|------|
| ER $\alpha$          | SRR1635445, SRR1635446                                      | SRR1635437,<br>SRR1635438                           | 7    |
| FoxA1                | SRR1635461, SRR1635462                                      | SRR1635437,<br>SRR1635438                           | 7    |
| GATA3                | SRR540196, SRR540198,<br>SRR540200, SRR540202,<br>SRR540204 | SRR540220                                           | 8    |
| AP2 $\gamma$         | SRR039385                                                   | SRR039386                                           | 9    |
| p300                 | SRR577809, SRR577810                                        | SRR577916,<br>SRR577917,<br>SRR577918,<br>SRR577919 | 25   |
| H3K4me1              | SRR1275469, SRR1275470                                      | SRR1275475,<br>SRR1275476                           | 26   |
| H3K4me3              | SRR1275471, SRR1275472                                      | SRR1275475,<br>SRR1275476                           | 26   |
| H3K27ac              | SRR1275473, SRR1275474                                      | SRR1275475,<br>SRR1275476                           | 26   |
| CTCF                 | SRR357511, SRR357512                                        | SRR357466                                           | 27   |
| ER $\alpha$ (mouse)  | SRR647493                                                   | SRR647494                                           | 28   |

## Supplementary References

1. Ernst, J., and Kellis, M. (2012) ChromHMM: automating chromatin-state discovery and characterization. *Nat Methods* **9**, 215-216
2. Grant, C. E., Bailey, T. L., and Noble, W. S. (2011) FIMO: scanning for occurrences of a given motif. *Bioinformatics* **27**, 1017-1018
3. McLean, C. Y., Bristol, D., Hiller, M., Clarke, S. L., Schaar, B. T., Lowe, C. B., Wenger, A. M., and Bejerano, G. (2010) GREAT improves functional interpretation of cis-regulatory regions. *Nat Biotechnol* **28**, 495-501
4. Gilbert, N., and Labuda, D. (1999) CORE-SINES: eukaryotic short interspersed retroposing elements with common sequence motifs. *Proc Natl Acad Sci U S A* **96**, 2869-2874
5. Rohrmoser, M., Kluge, M., Yahia, Y., Gruber-Eber, A., Maqbool, M. A., Forne, I., Krebs, S., Blum, H., Greifenberg, A. K., Geyer, M., Descostes, N., Imhof, A., Andrau, J. C., Friedel, C. C., and Eick, D. MIR sequences recruit zinc finger protein ZNF768 to expressed genes. *Nucleic Acids Res* **47**, 700-715
6. Chuong, E. B., Elde, N. C., and Feschotte, C. (2016) Regulatory evolution of innate immunity through co-option of endogenous retroviruses. *Science* **351**, 1083-1087
7. Franco, H. L., Nagari, A., and Kraus, W. L. (2015) TNFalpha signaling exposes latent estrogen receptor binding sites to alter the breast cancer cell transcriptome. *Mol Cell* **58**, 21-34
8. Theodorou, V., Stark, R., Menon, S., and Carroll, J. S. (2012) GATA3 acts upstream of FOXA1 in mediating ESR1 binding by shaping enhancer accessibility. *Genome Res* **23**, 12-22
9. Woodfield, G. W., Chen, Y., Bair, T. B., Domann, F. E., and Weigel, R. J. (2010) Identification of primary gene targets of TFAP2C in hormone responsive breast carcinoma cells. *Genes Chromosomes Cancer* **49**, 948-962
10. Malovannaya, A., Lanz, R. B., Jung, S. Y., Bulynko, Y., Le, N. T., Chan, D. W., Ding, C., Shi, Y., Yucer, N., Krenciute, G., Kim, B. J., Li, C., Chen, R., Li, W., Wang, Y., O'Malley, B. W., and Qin, J. (2011) Analysis of the human endogenous coregulator complexome. *Cell* **145**, 787-799
11. Xu, J., Liao, L., Ning, G., Yoshida-Komiya, H., Deng, C., and O'Malley, B. W. (2000) The steroid receptor coactivator SRC-3 (p/CIP/RAC3/AIB1/ACTR/TRAM-1) is required for normal growth, puberty, female reproductive function, and mammary gland development. *Proc Natl Acad Sci U S A* **97**, 6379-6384
12. Burwinkel, B., Wirtenberger, M., Klaes, R., Schmutzler, R. K., Grzybowska, E., Forsti, A., Frank, B., Bermejo, J. L., Bugert, P., Wappenschmidt, B., Butkiewicz, D., Pamula, J., Pekala, W., Zientek, H., Mielzynska, D., Siwinska, E., Bartram, C. R., and Hemminki, K. (2005) Association of NCOA3 polymorphisms with breast cancer risk. *Clin Cancer Res* **11**, 2169-2174
13. Morimoto-Tomita, M., Uchimura, K., Bistrup, A., Lum, D. H., Egeblad, M., Boudreau, N., Werb, Z., and Rosen, S. D. (2005) Sulf-2, a proangiogenic heparan sulfate endosulfatase, is upregulated in breast cancer. *Neoplasia* **7**, 1001-1010
14. Wang, X. (2014) An Exploration of Mutation Status of Cancer Genes in Breast Cancers. *Journal of Next Generation Sequencing & Applications* **1**, 103
15. Nassa, G., Tarallo, R., Guzzi, P. H., Ferraro, L., Cirillo, F., Ravo, M., Nola, E., Baumann, M., Nyman, T. A., Cannataro, M., Ambrosino, C., and Weisz, A. (2011) Comparative analysis of nuclear estrogen receptor alpha and beta interactomes in breast cancer cells. *Mol Biosyst* **7**, 667-676
16. Askarian-Amiri, M. E., Crawford, J., French, J. D., Smart, C. E., Smith, M. A., Clark, M. B., Ru, K., Mercer, T. R., Thompson, E. R., Lakhani, S. R., Vargas, A. C., Campbell, I. G., Brown, M. A., Dinger, M. E., and Mattick, J. S. (2011) SNORD-host RNA Zfas1 is a regulator of mammary development and a potential marker for breast cancer. *RNA* **17**, 878-891
17. Lee, K., Gjorevski, N., Boghaert, E., Radisky, D. C., and Nelson, C. M. (2011) Snail1, Snail2, and E47 promote mammary epithelial branching morphogenesis. *Embo J* **30**, 2662-2674

18. Grimm, S. L., and Rosen, J. M. (2003) The role of C/EBPbeta in mammary gland development and breast cancer. *J Mammary Gland Biol Neoplasia* **8**, 191-204
19. Robinson, G. W., Johnson, P. F., Hennighausen, L., and Sterneck, E. (1998) The C/EBPbeta transcription factor regulates epithelial cell proliferation and differentiation in the mammary gland. *Genes Dev* **12**, 1907-1916
20. Seagroves, T. N., Krnacik, S., Raught, B., Gay, J., Burgess-Beusse, B., Darlington, G. J., and Rosen, J. M. (1998) C/EBPbeta, but not C/EBPalpha, is essential for ductal morphogenesis, lobuloalveolar proliferation, and functional differentiation in the mouse mammary gland. *Genes Dev* **12**, 1917-1928
21. Milani, E. S., Brinkhaus, H., Dueggeli, R., Klebba, I., Mueller, U., Stadler, M., Kohler, H., Smalley, M. J., and Bentires-Alj, M. (2013) Protein tyrosine phosphatase 1B restrains mammary alveologenesis and secretory differentiation. *Development* **140**, 117-125
22. Julien, S. G., Dube, N., Read, M., Penney, J., Paquet, M., Han, Y., Kennedy, B. P., Muller, W. J., and Tremblay, M. L. (2007) Protein tyrosine phosphatase 1B deficiency or inhibition delays ErbB2-induced mammary tumorigenesis and protects from lung metastasis. *Nat Genet* **39**, 338-346
23. Barlund, M., Monni, O., Weaver, J. D., Kauraniemi, P., Sauter, G., Heiskanen, M., Kallioniemi, O. P., and Kallioniemi, A. (2002) Cloning of BCAS3 (17q23) and BCAS4 (20q13) genes that undergo amplification, overexpression, and fusion in breast cancer. *Genes Chromosomes Cancer* **35**, 311-317
24. Ruan, Y., Ooi, H. S., Choo, S. W., Chiu, K. P., Zhao, X. D., Srinivasan, K. G., Yao, F., Choo, C. Y., Liu, J., Ariyaratne, P., Bin, W. G., Kuznetsov, V. A., Shahab, A., Sung, W. K., Bourque, G., Palanisamy, N., and Wei, C. L. (2007) Fusion transcripts and transcribed retrotransposed loci discovered through comprehensive transcriptome analysis using Paired-End diTags (PETs). *Genome Res* **17**, 828-838
25. Gertz, J., Savic, D., Varley, K. E., Partridge, E. C., Safi, A., Jain, P., Cooper, G. M., Reddy, T. E., Crawford, G. E., and Myers, R. M. (2013) Distinct properties of cell-type-specific and shared transcription factor binding sites. *Mol Cell* **52**, 25-36
26. Brunelle, M., Nordell Markovits, A., Rodrigue, S., Lupien, M., Jacques, P. E., and Gevry, N. (2015) The histone variant H2A.Z is an important regulator of enhancer activity. *Nucleic Acids Res* **43**, 9742-9756
27. ENCODE\_Project\_Consortium (2012) An integrated encyclopedia of DNA elements in the human genome. *Nature* **489**, 57-74
28. Nautiyal, J., Steel, J. H., Mane, M. R., Oduwole, O., Poliandri, A., Alexi, X., Wood, N., Poutanen, M., Zwart, W., Stingl, J., and Parker, M. G. (2013) The transcriptional co-factor RIP140 regulates mammary gland development by promoting the generation of key mitogenic signals. *Development* **140**, 1079-1089
